# Supplementary material for: Second-generation antipsychotic medications and risk of chronic kidney disease in schizophrenia: population-based nested case–control study
Source: PubMed Central journal article supplement — BMJ Open. 2018 May 24;8(5):e019868. doi: 10.1136/bmjopen-2017-019868 (PMC5988075; doi:10.1136/bmjopen-2017-019868), 2018-05-24
Supplement: bmjopen-2017-019868.draft_revisions.pdf [file bmjopen-2017-019868.draft_revisions.pdf]

# BMJ Open

BMJ Open is committed to open peer review. As part of this commitment we make the peer review history of every article we publish publicly available.

When an article is published we post the peer reviewers' comments and the authors' responses online. We also post the versions of the paper that were used during peer review. These are the versions that the peer review comments apply to.

The versions of the paper that follow are the versions that were submitted during the peer review process. They are not the versions of record or the final published versions. They should not be cited or distributed as the published version of this manuscript.

BMJ Open is an open access journal and the full, final, typeset and author-corrected version of record of the manuscript is available on our site with no access controls, subscription charges or pay-per-view fees (<http://bmjopen.bmj.com>).

If you have any questions on BMJ Open's open peer review process please email [info.bmjopen@bmj.com](mailto:info.bmjopen@bmj.com)

# BMJ Open

## Second-generation antipsychotic medications and risk of chronic kidney disease in schizophrenia

|                                    |                                                                                                                                                                                                                                         |
|------------------------------------|-----------------------------------------------------------------------------------------------------------------------------------------------------------------------------------------------------------------------------------------|
| Journal:                           | <i>BMJ Open</i>                                                                                                                                                                                                                         |
| Manuscript ID                      | bmjopen-2017-019868                                                                                                                                                                                                                     |
| Article Type:                      | Research                                                                                                                                                                                                                                |
| Date Submitted by the Author:      | 06-Oct-2017                                                                                                                                                                                                                             |
| Complete List of Authors:          | Wang, Hsien-Yi ; Chi Mei Medical Center, Nephrology<br>Huang, Charles Lung-Cheng ; Chi Mei Medical Center, Psychiatry<br>Feng, I Jung ; Chi Mei Medical Center, Chi Mei Hospital, Department of<br>Medical Research<br>Tsuang, Hui-Chun |
| <b>Primary Subject<br>Heading</b>: | Epidemiology                                                                                                                                                                                                                            |
| Secondary Subject Heading:         | Pharmacology and therapeutics                                                                                                                                                                                                           |
| Keywords:                          | second-generation antipsychotics, chronic kidney disease, schizophrenia                                                                                                                                                                 |
|                                    |                                                                                                                                                                                                                                         |

SCHOLARONE™  
Manuscripts

For peer review only

1  
2  
3  
4 **Second-generation antipsychotic medications and risk of**  
5  
6  
7 **chronic kidney disease in schizophrenia**  
8

9 **Running title:** Antipsychotics and kidney disease  
10

11 Hsien-Yi Wang, Charles Lung-Cheng Huang, I Jung Feng, Hui-Chun Tsuang\*  
12  
13

14  
15  
16  
17  
18  
19 **Address correspondence to:** Hui-Chun Tsuang, Center of General Education, School  
20  
21 of Liberal Arts Education, Chang Jung Christian University, No. 1, Changda Rd.,  
22  
23 Gueiren Dist., Tainan City 71101, Taiwan.  
24

25 Tel.: (+886) 6-278-5123; Fax: (+886) 6-278-5062; E-mail: hctsuang@gmail.com  
26  
27

28  
29  
30 **Key words:** second-generation antipsychotics; chronic kidney disease; schizophrenia  
31  
32  
33  
34  
35  
36  
37  
38  
39  
40  
41  
42  
43  
44  
45  
46  
47  
48  
49  
50  
51  
52  
53  
54  
55  
56  
57  
58  
59  
60

1  
2  
3  
4  
5  
6  
7  
8  
9  
10  
11  
12  
13  
14  
15  
16  
17  
18  
19  
20  
21  
22  
23  
24  
25  
26  
27  
28  
29  
30  
31  
32  
33  
34  
35  
36  
37  
38  
39  
40  
41  
42  
43  
44  
45  
46  
47  
48  
49  
50  
51  
52  
53  
54  
55  
56  
57  
58  
59  
60

## ABSTRACT

Objectives: The study aims to compare the risk of chronic renal diseases (CKD) between schizophrenic patients using first and second generation antipsychotics.

Setting: Datasets of 2000-2013 National Health Insurance in Taiwan were used.

Participants: The National Health Insurance reimbursement claims data have been transferred to and managed by the National Health Research Institute in Taiwan since 1996. We used the Psychiatric Inpatient Medical Claims database, a subset of the National Health Insurance Research Database, comprising a cohort of patients hospitalized for psychiatric disorders between 2000 and 2013 (n = 267807). The database included patients with at least one psychiatric inpatient record and one discharge diagnosis of mental disorders coded by the International Classification of Diseases, Ninth Revision (ICD-9) codes 290-319. The age of patients at first admission was restricted to 18-65 years.

Primary outcome: CKD (ICD-9 code 582, 583, 585, 586, 588) requiring hospitalization or three outpatient visits. The diagnosis of CKD follows the criteria of 'Kidney Disease: Improving Global Outcomes (KDIGO)' in Taiwan. CKD is defined as kidney damage as albumin-to-creatinine ratio >30 mg/g in two of three spot urine specimens, or glomerular filtration rate (GFR) <60 mL/min/1.73 m<sup>2</sup>, for 3 months or more.

Results: We found that the risks for CKD for those who used second generation antipsychotics longer cumulatively were higher than those who did not use second generation antipsychotics. Using nonusers as reference group, the risks for CKD comparing those using second generation antipsychotics for 90 to 180 days with nonusers and those using second generation antipsychotics for more than 1000 days were 1.42 (1.06-1.91) and 1.30 (1.13-1.51), respectively.

Conclusions: The current study suggests the relationship between using second-generation antipsychotics and risk of CKD.

### Article summary:

Strengths: We tracked subjects for period longer than 1000 days after the index day.

Limitations: Using existing dataset without personal identification, we cannot investigate all risk factors in the study.

Bullet points: The risk of CKD of inpatients of schizophrenia deserves further investigation. Besides, the study of risk of CKD for schizophrenic patients might need longer tracking duration.

## 1. Introduction

Schizophrenia is a chronic mental illness with lifetime prevalence rate around 1% (Chien et al., 2009; Hovatta et al., 1997). Patients with schizophrenia have been shown to have an excess mortality, being 2 or 3 times as high as that in the general population (Brown, 1997; Brown et al., 2010; Osby et al., 2000). Cardiovascular diseases have an increased prevalence among patients with schizophrenia (Capasso et al., 2008). Metabolic syndrome (MetS), a collection of visceral adiposity (measured by waist size), high fasting glucose, increased blood pressure, elevated triglyceride levels, and low high-density lipoprotein cholesterol levels (Grundy et al., 2005), also seems to be a vital health problem to schizophrenia patients (Correll et al., 2015; Manu et al., 2015). Furthermore, patients with schizophrenia are liable to develop diabetes mellitus (DM) (Chien et al., 2009; Saddichha et al., 2008) and chronic kidney diseases (CKD) (Tzeng et al., 2015).

The introduction of second-generation antipsychotics in the early 1990s was initially associated with better quality of life, lower rate of relapse, and better tolerability than first-generation antipsychotics (Awad and Voruganti, 2004; Leucht et al., 2003a; Leucht et al., 2003b). However, the superiority of second-generation antipsychotics has been criticized by subsequent studies (Jones et al., 2006; Lieberman et al., 2005). For example, the association between weight gain and use of second-generation antipsychotics, clozapine in particular, has been reported (Bai et al., 2011).

More recent studies confirmed the above finding regarding to the concern of using second-generation antipsychotic medications. A study using the National Health Insurance Research Database in Taiwan (Kuo et al., 2013) found that use of clozapine, quetiapine, olanzapine, zotepine, and risperidone was associated with increased risk of pneumonia. A nationwide German/Austrian Diabetes Survey, which recruiting 60,162 teenagers with type 1 diabetes, demonstrated that subjects treated with second-generation antipsychotics, risperidone in particular, showed higher BMI (Galler et al., 2015). A national study (Rubin et al., 2015) conducted in the US compared 107,551 youths using second-generation antipsychotics with 1,221,434 youths not using second-generation antipsychotics. The risk for incident diabetes mellitus was increased in youths taking second-generation antipsychotics. The risk was higher among those using ziprasidone and aripiprazole. However, the risk for incident type 2 diabetes mellitus was not associated with newer second-generation antipsychotics, quetiapine and olanzapine.

In order to provide a more comprehensive evaluation comparing the side effects of second- and first-generation antipsychotics, we consider CKD to be included as an outcome variable, too. DM was one of risk factors to develop CKD (Hwang et al.,

2010). In addition, schizophrenia has been shown to be associated with an increased risk of CKD in a nationwide study in Taiwan (Tzeng et al., 2015).

## 2. Methods

### 2.1. Study subjects

Taiwan started a single-payer National Health Insurance program on March 1, 1995. The National Health Insurance reimbursement claims data have been transferred to and managed by the National Health Research Institute in Taiwan since 1996. The database includes medical claim files representative of the entire population in Taiwan. All investigators signed an agreement that guarantees patient confidentiality before using the data. We used the Psychiatric Inpatient Medical Claims database, a subset of the National Health Insurance Research Database, comprising a cohort of patients hospitalized for psychiatric disorders between 2000 and 2013 (n = 267807). The database included patients with at least one psychiatric inpatient record and one discharge diagnosis of mental disorders coded by the International Classification of Diseases, Ninth Revision (ICD-9) codes 290-319. The database includes patients' demographic characteristics, diagnoses, medical expenditures, and prescription claims data (Gau et al., 2010). Each prescription record contains type of medication, dosage, time of prescription, and duration of drug supply. Information which could be used to identify beneficiaries and medical care providers were scrambled by the Bureau of National Health Insurance (Gau et al., 2008). We enrolled patients with at least one psychiatric admission between 2000 and 2013 but no psychiatric admissions between 1996 and 1999 (n = 13644). The inclusion criteria for the study cohort was that one's diagnosis at each discharge fulfilled the principal diagnosis of schizophrenia (ICD-9 code 295.\*\*\*) if a patient had several psychiatric admissions. The age of patients at first admission was restricted to 18-65 years.

### 2.2. Case and control definition

Using the patients with CKD (ICD-9 code 582, 583, 585, 586, 588) requiring hospitalization or three outpatient visits as cases (n = 3411), we conducted a nested case-control study derived from the cohort. The date of hospitalization for CKD or the third outpatient visit was defined as the index date. The diagnosis of CKD follows the criteria of 'Kidney Disease: Improving Global Outcomes (KDIGO)' in Taiwan. CKD is defined as kidney damage as albumin-to-creatinine ratio >30 mg/g in two of three spot urine specimens, or glomerular filtration rate (GFR) <60 mL/min/1.73 m<sup>2</sup>, for 3 months or more. For each case, 3 matched control subjects were randomly selected from the same schizophrenia cohort. Control subjects were matched to the patients for

1  
2  
3 age, gender, and the index date. Each control was assigned the index date of the  
4 corresponding case.  
5  
6  
7  
8

### 9 2.3. *Measurement of exposure*

10 The data of antipsychotic drug use was derived from the prescription files. The  
11 duration of treatment was calculated using the dispensed number of units and the  
12 dosing regimen for each patient. Second-generation antipsychotic drugs used in our  
13 study included clozapine, olanzapine, quetiapine, zotepine, risperidone, amisulpride,  
14 ziprasidone, aripiprazole, and paliperidone. First-generation antipsychotic drugs used  
15 in our study included chlorpromazine, levomepromazine, fluphenazine, perphenazine,  
16 trifluoperazine, thioridazine, pipotiazine, haloperidol, moperone, flupentixol,  
17 clopenthixol, chlorprothixene, pimozide, loxapine, sulpiride, clotiapine, and  
18 penfluridol. Because this study focused on the associations between the individual  
19 second-generation antipsychotic drug and the risk of CKD, all first-generation  
20 antipsychotic drugs were grouped together in the data analysis.  
21  
22  
23  
24  
25  
26  
27  
28

### 29 2.4. *Covariates*

30 Age and gender were controlled by the matching process of the study design.  
31  
32  
33

### 34 2.5. *Statistical analysis*

35 For the comparisons of demographic between cases and controls, *t* test was used  
36 for continuous variables and  $\chi^2$  tests for discrete variables. Univariate and  
37 multivariate conditional logistic regressions were used to estimate the associations  
38 between the exposure to antipsychotic use and risk of CKD. Odds ratios (ORs) with  
39 95% confidence intervals (CIs) were calculated. A p-value .05 was considered  
40 significant.  
41  
42  
43  
44

## 45 3. Results

46 We identified 3411 cases of CKD. The age and gender distributions of the cases  
47 and control subjects were well matched. The cases were more likely than controls to  
48 have comorbid conditions (Table 1).  
49  
50

51 Table 2 showed that 1364 cases (40.0%) and 3559 controls (34.8%) were nonusers  
52 of antipsychotics. Using nonusers as reference group, the adjusted odds ratios for  
53 those who used first generation antipsychotics alone and those who used both first and  
54 second generation antipsychotics were 0.76 and 0.64, respectively.  
55  
56

57 Table 3 showed that 303 cases and 1304 controls did not use any second  
58  
59  
60

1  
2  
3 generation antipsychotics. Using nonusers as reference group, the risks for CKD  
4 comparing those using second generation antipsychotics for 90 to 180 days with  
5 nonusers and those using second generation antipsychotics for more than 1000 days  
6 were 1.42 and 1.30, respectively (table 3). Considering varied second generation  
7 antipsychotics individually, using nonusers as reference group, the risks for CKD  
8 varied from 1.14 to 1.48.  
9  
10  
11

#### 12 13 4. Discussion

14 We found that the risks for CKD for those who used second generation  
15 antipsychotics longer cumulatively were higher than those who did not use second  
16 generation antipsychotics. In addition, those who used only first generation  
17 antipsychotics and those who used both first and second generation antipsychotics  
18 seemed to have lower risk for CKD.  
19  
20  
21

22 Also using the dataset of Taiwan National Health Insurance, Tzeng et al. (Tzeng et  
23 al., 2015) found that neither first nor second generation antipsychotics increased the  
24 risk of CKD. However, the study design of Tzeng et al. and ours varied a lot. Firstly,  
25 we focused on in patients while Tzeng et al. recruited patients with a first-time  
26 diagnosis of schizophrenia. Secondly, subjects of Tzeng et al. were tracked for 3 years  
27 or the end of 2010 from the index date until date of CKD diagnosis. We tracked  
28 subjects for longer period with one group tracked for 180 – 1000 days and another for  
29 period longer than 1000 days.  
30  
31  
32

33 The introduction of second-generation antipsychotics in the early 1990s was  
34 initially shown better quality of life, lower rate of relapse, and better tolerability than  
35 first-generation antipsychotics for patients of schizophrenia.(Awad and Voruganti,  
36 2004; Leucht et al., 2003a; Leucht et al., 2003b) but has been criticized by other  
37 studies (Jones et al., 2006; Lieberman et al., 2005). The risk of pneumonia in  
38 inpatients with schizophrenia was examined using the National Health Insurance  
39 Research Database in Taiwan from 2000 to 2008 (Kuo et al., 2013). They found that  
40 current used of clozapine, one kind of second-generation antipsychotics, was  
41 associated with a dose-dependent increase in the risk of pneumonia for inpatients with  
42 schizophrenia. In addition, other kinds of second-generation antipsychotics, including  
43 quetiapine, olanzapine, zotepine, and risperidone, were associated with increased risk  
44 of pneumonia while no clear dose-dependent relationship was found. They suggested  
45 that patients with schizophrenia who used these antipsychotics to be monitored for  
46 pneumonia. Our study further suggests that inpatients with schizophrenia being  
47 monitored for CKD since we found that the risks for CKD for those who used second  
48 generation antipsychotics longer cumulatively were higher than those who did not use  
49 second generation antipsychotics. Similar to the findings of kuo et al., we did not see  
50  
51  
52  
53  
54  
55  
56  
57  
58  
59  
60



dose-dependent relationship second generation antipsychotics and risk of CKD.

The increasing prevalence of end-stage renal disease (ESRD) has been a global challenge. In the US, chronic renal diseases are the nation's ninth leading cause of death (Arias et al., 2003). In Taiwan, chronic renal diseases have been the eighth leading cause of death since 1997, and was still the tenth leading cause of death recently (Department of Health, 2017). Meanwhile, the high prevalence of CKD might contribute to the high prevalence of ESRD in Taiwan (Hsu et al., 2006). Our finding that inpatients with schizophrenia who used second generation antipsychotics longer have higher risks for CKD than those who did not use second generation antipsychotics reminds this population being monitored for CKD.

Some limitations need to be considered in the current study. First, because our data source is from a claim data set, it is hard to know how much medication each patient really take. Second, we can not include variables not captured in claim database, such as patients' lifestyle and family history. However, the current study suggests a hypothesis regarding the relationship between using second-generation antipsychotics and risk of CKD which warrants further study.

#### Declaration of interest

All authors declare that they have no conflicts of interest.

#### Contributors

Hui-Chun Tsuang and Hsien-Yi Wang initiated the study. Hui-Chun Tsuang, Hsien-Yi Wang and Charles Lung-Cheng Huang designed the study. I Jung Feng analyzed the data. Hui-Chun Tsuang wrote the manuscript and Hsien-Yi Wang, Charles Lung-Cheng Huang and I Jung Feng approved the final manuscript.

#### Acknowledgements

*The authors thank the Bureau of National Health Insurance and National Health Institutes for making available the databases for this study.*

#### DATA SHARING STATEMENT

Datasets of National Health Insurance in Taiwan were used. All investigators should sign an agreement that guarantees patient confidentiality before using the data.

#### References

Arias, E., Anderson, R., Kung, H., Murphy, S., Kochanek, K., 2003. Deaths: final data for 2001. *Natl Vital Stat Rep* 52(3), 1-115.

- 1  
2  
3 Awad, A., Voruganti, L., 2004. Impact of atypical antipsychotics on quality of life in  
4 patients with schizophrenia. *CNS Drugs* 18, 877-893.
- 5  
6 Bai, Y., Lin, C., Chen, J., Chen, T., Su, T., Chou, P., 2011. Association of weight gain and  
7 metabolic syndrome in patients taking clozapine: an 8-year cohort study. *J Clin*  
8 *Psychiatry* 72, 751-756.
- 9  
10 Brown, S., 1997. Excess mortality of schizophrenia. A meta-analysis. *Br J Psychiatry*  
11 171, 502-508.
- 12  
13 Brown, S., Kim, M., Mitchell, C., Inskip, H., 2010. Twenty-five year mortality of a  
14 community cohort with schizophrenia. *Br J Psychiatry* 196(116-121).
- 15  
16 Capasso, R., Lineberry, T., Bostwick, J., Decker, P., St Sauver, J., 2008. Mortality in  
17 schizophrenia and schizoaffective disorder: an Olmsted County, Minnesota  
18 cohort: 1950-2005. *Schizophrenia Research* 98, 287-294.
- 19  
20 Chien, I.C., Hsu, J.-H., Lin, C.-H., Bih, S.-H., Chou, Y.-J., Chou, P., 2009. Prevalence of  
21 diabetes in patients with schizophrenia in Taiwan: a population-based National  
22 Health Insurance study. *Schizophrenia Research* 111(1-3), 17-22.
- 23  
24 Correll, C., Detraux, J., De Lepeleire, J., De Hert, M., 2015. Effects of antipsychotics,  
25 antidepressants and mood stabilizers on risk for physical diseases in people with  
26 schizophrenia, depression and bipolar disorder. *World Psychiatry* 14(2), 119-136.
- 27  
28 Department of Health, 2017. Department of Health: Health and Vital Statistics  
29 Republic of China 2017, Taiwan, ROC.
- 30  
31 Galler, A., Bollow, E., Meusers, M., Bartus, B., Näke, A., Haberland, H., Schober, E.,  
32 Holl, R., Mellitus, G.F.M.o.E.a.R.B.C.N.D., 2015. Comparison of glycemic and  
33 metabolic control in youth with type 1 diabetes with and without antipsychotic  
34 medication: analysis from the nationwide German/Austrian Diabetes Survey  
35 (DPV). *Diabetes Care* 38(6), 1051-1057.
- 36  
37 Gau, C., Chang, C., Tsai, F., Chao, P., Gau, S., 2010. Association between mood  
38 stabilizers and hypothyroidism in patients with bipolar disorders: a nested,  
39 matched case-control study. *Bipolar Disord* 12, 253-263.
- 40  
41 Gau, S., Chung, C., Gau, C., 2008. A pharmacoeconomic analysis of atypical  
42 antipsychotics and haloperidol in first-episode schizophrenic patients in taiwan.  
43 *J Clin Psychopharmacol* 28, 271-278.
- 44  
45 Grundy, S., Cleeman, J., Daniels, S., Donato, K., Eckel, R., Franklin, B., Gordon, D.,  
46 Krauss, R., Savage, P., Smith, S.J., Spertus, J., Costa, F., American Heart  
47 Association; National Heart, L., and Blood Institute, 2005. Diagnosis and  
48 management of the metabolic syndrome: an American Heart  
49 Association/National Heart, Lung, and Blood Institute Scientific Statement.  
50 *Circulation* 112, 2735-2752.
- 51  
52 Hovatta, I., Terwilliger, J., Lichtermann, D., Mäkikyrö, T., Suvisaari, J., Peltonen, L.,  
53  
54  
55  
56  
57  
58  
59  
60

- 1  
2  
3 Lönnqvist, J., 1997. Schizophrenia in the genetic isolate of Finland. *American*  
4 *Journal of Medical Genetics* 74, 353-360.
- 5  
6 Hsu, C., Hwang, S., Wen, C., Chang, H., Chen, T., Shiu, R., Horng, S., Chang, Y., Yang,  
7 W., 2006. High prevalence and low awareness of CKD in Taiwan: a study on the  
8 relationship between serum creatinine and awareness from a nationally  
9 representative survey. *Am J Kidney Dis* 48, 727-738.
- 10  
11 Hwang, S., Tsai, J., Chen, H., 2010. Epidemiology, impact and preventive care of  
12 chronic kidney disease in Taiwan. *Nephrology (Carlton) Suppl* 2, 3-9.
- 13  
14 Jones, P., Barnes, T., Davies, L., Dunn, G., Lloyd, H., Hayhurst, K., Murray, R., Markwick,  
15 A., Lewis, S., 2006. Randomized controlled trial of the effect on Quality of Life of  
16 second- vs first-generation antipsychotic drugs in schizophrenia: Cost Utility of  
17 the Latest Antipsychotic Drugs in Schizophrenia Study (CUtLASS 1). *Arch Gen*  
18 *Psychiatry* 63, 1079-1087.
- 19  
20 Kuo, C., Yang, S., Liao, Y., Chen, W., Lee, W., Shau, W., Chang, Y., Tsai, S., Chen, C.,  
21 2013. Second-generation antipsychotic medications and risk of pneumonia in  
22 schizophrenia. *Schizophr Bull* 39, 648-657.
- 23  
24 Leucht, S., Barnes, T., Kissling, W., Engel, R., Correll, C., Kane, J., 2003a. Relapse  
25 prevention in schizophrenia with new-generation antipsychotics: a systematic  
26 review and exploratory meta-analysis of randomized, controlled trials. *Am J*  
27 *Psychiatry* 160, 1209-1222.
- 28  
29 Leucht, S., Wahlbeck, K., Hamann, J., Kissling, W., 2003b. New generation  
30 antipsychotics versus low-potency conventional antipsychotics: a systematic  
31 review and meta-analysis. *Lancet* 361, 1581-1589.
- 32  
33 Lieberman, J., Stroup, T., McEvoy, J., Swartz, M., Rosenheck, R., Perkins, D., Keefe RS,  
34 Davis, S., Davis, C., Lebowitz, B., Severe, J., Hsiao, J., Investigators., C.A.T.o.I.E.C.,  
35 2005. Effectiveness of antipsychotic drugs in patients with chronic schizophrenia.  
36 *N Engl J Med* 353, 1209-1223.
- 37  
38 Manu, P., Dima, L., Shulman, M., Vancampfort, D., De Hert, M., Correll, C., 2015.  
39 Weight gain and obesity in schizophrenia: epidemiology, pathobiology, and  
40 management. *Acta Psychiatr Scand* 132(2), 97-108.
- 41  
42 Osby, U., Correia, N., Brandt, L., Ekblom, A., Sparén, P., 2000. Time trends in  
43 schizophrenia mortality in Stockholm county, Sweden: cohort study. *BMJ* 321,  
44 483-484.
- 45  
46 Rubin, D., Kreider, A., Matone, M., Huang, Y., Feudtner, C., Ross, M., Localio, A., 2015.  
47 Risk for incident diabetes mellitus following initiation of second-generation  
48 antipsychotics among Medicaid-enrolled youths. *JAMA Pediatr* 169(4), e150285.
- 49  
50 Saddichha, S., Manjunatha, N., Ameen, S., Akhtar, S., 2008. Diabetes and  
51 schizophrenia - effect of disease or drug? Results from a randomized,  
52  
53  
54  
55  
56  
57  
58  
59  
60

1  
2  
3 double-blind, controlled prospective study in first-episode schizophrenia. *Acta*  
4 *Psychiatrica Scandinavica* 117(5), 342-347.

5  
6 Tzeng, N., Hsu, Y., Ho, S., Kuo, Y., Lee, H., Yin, Y., Chen, H., Chen, W., Chu, W., Huang,  
7 H., 2015. Is schizophrenia associated with an increased risk of chronic kidney  
8 disease? A nationwide matched-cohort study. *BMJ Open* 5, e006777.  
9  
10  
11  
12  
13  
14  
15  
16  
17  
18  
19  
20  
21  
22  
23  
24  
25  
26  
27  
28  
29  
30  
31  
32  
33  
34  
35  
36  
37  
38  
39  
40  
41  
42  
43  
44  
45  
46  
47  
48  
49  
50  
51  
52  
53  
54  
55  
56  
57  
58  
59  
60

**Table 1** Basic characteristics of the study population

| Characteristic                       | Cases (n = 3411) n (%) | Controls (n = 10,233) n (%) | p        |
|--------------------------------------|------------------------|-----------------------------|----------|
| Age (mean ± SD years)                | 41.05 ± 10.23          | 41.05 ± 10.240              | 0.999    |
| Male                                 | 1871 (54.9)            | 5613 (54.9)                 | > 0.999  |
| Follow-up duration (mean ± SD years) | 7.71 ± 4.71            | 7.71 ± 4.71                 | 0.971    |
| Comorbidities                        |                        |                             |          |
| Diabetes mellitus                    | 1299 (38.1)            | 1006 (9.8)                  | < 0.0001 |
| Congestive heart failure             | 207 (6.1)              | 86 (0.8)                    | < 0.0001 |
| Myocardial infarction                | 41 (1.2)               | 23 (0.2)                    | < 0.0001 |
| Stroke                               | 220 (6.5)              | 195 (1.9)                   | < 0.0001 |
| Hyperlipidemia                       | 502 (14.7)             | 433 (4.2)                   | < 0.0001 |
| Hypercholesterolemia                 | 111 (3.3)              | 90 (0.9)                    | < 0.0001 |
| Hypertriglyceridemia                 | 86 (2.5)               | 62 (0.6)                    | < 0.0001 |
| Hypertension                         | 1232 (36.1)            | 1147 (11.2)                 | < 0.0001 |
| Obesity                              | 49 (1.4)               | 37 (0.4)                    | < 0.0001 |

SD: standard deviation.

**Table 2** Comparison of crude and adjusted odds ratio for CKD among types of antipsychotics by conditional logistic regression

| Drug used   | CKD cases (n = 3411) | Controls (n = 10,233) | OR (95% CI)       | AOR <sup>a</sup> (95% CI) |
|-------------|----------------------|-----------------------|-------------------|---------------------------|
| Nonusers    | 1364                 | 3559                  | 1                 | 1                         |
| FGA alone   | 930                  | 2890                  | 0.84 (0.76-0.93)* | 0.76 (0.68-0.84)*         |
| SGA alone   | 178                  | 470                   | 0.99 (0.82-1.19)  | 0.85 (0.69-1.04)          |
| Combination | 939                  | 3314                  | 0.74 (0.67-0.81)* | 0.64 (0.57-0.71)*         |

OR: odds ratio; C I: confidence interval; AOR: adjusted odds ratio; FGA: first generation antipsychotic; SGA: second generation antipsychotic.

<sup>a</sup>Adjusted for age, gender, diabetes mellitus, congestive heart failure, myocardial infarction, stroke, hyperlipidemia, hypercholesterolemia, hypertriglyceridemia, hypertension, and obesity.

**Table 3** Overall cumulative period of using second generation antipsychotics

| Period of SGA use                       | CKD cases (n = 3411) | Controls (n = 10,233) | OR (95% CI)       | AOR <sup>a</sup> (95% CI) |
|-----------------------------------------|----------------------|-----------------------|-------------------|---------------------------|
| <b>Cumulative SGA use</b>               |                      |                       |                   |                           |
| nonusers                                | 303                  | 1304                  | 1                 | 1                         |
| 0 < period ≤ 90                         | 177                  | 552                   | 1.38 (1.12-1.71)* | 1.20 (0.95-1.51)          |
| 90 < period ≤ 180                       | 92                   | 241                   | 1.65 (1.26-2.16)* | 1.42 (1.06-1.91)*         |
| 180 < period ≤ 1000                     | 409                  | 1271                  | 1.39 (1.17-1.64)* | 1.19 (0.99-1.43)          |
| 1000 > period                           | 2430                 | 6865                  | 1.53 (1.34-1.75)* | 1.30 (1.13-1.51)*         |
| <b>Cumulative clozapine use (days)</b>  |                      |                       |                   |                           |
| nonusers                                | 2318                 | 7215                  | 1                 | 1                         |
| 0 < period ≤ 90                         | 183                  | 351                   | 1.63 (1.35-1.96)* | 1.48 (1.20-1.81)*         |
| 90 < period ≤ 180                       | 49                   | 140                   | 1.09 (0.79-1.52)  | 0.91 (0.63-1.32)          |
| 180 < period ≤ 1000                     | 178                  | 549                   | 1.01 (0.85-1.20)  | 0.94 (0.77-1.14)          |
| 1000 > period                           | 683                  | 1978                  | 1.08 (0.98-1.19)  | 1.14 (1.02-1.27)*         |
| <b>Cumulative olanzapine use (days)</b> |                      |                       |                   |                           |
| nonusers                                | 2046                 | 6465                  | 1                 | 1                         |
| 0 < period ≤ 90                         | 396                  | 1018                  | 1.23 (1.09-1.40)  | 1.18 (1.02-1.35)          |
| 90 < period ≤ 180                       | 156                  | 344                   | 1.44 (1.18-1.75)* | 1.37 (1.11-1.70)*         |
| 180 < period ≤ 1000                     | 401                  | 1038                  | 1.22 (1.08-1.39)* | 1.15 (1.00-1.32)*         |
| 1000 > period                           | 412                  | 1368                  | 0.95 (0.85-1.08)  | 1.05 (0.92-1.19)          |
| <b>Cumulative quetiapine use (days)</b> |                      |                       |                   |                           |
| nonusers                                | 1669                 | 6198                  | 1                 | 1                         |

| Period of SGA use                        | CKD cases (n = 3411) | Controls (n = 10,233) | OR (95% CI)       | AOR <sup>a</sup> (95% CI) |
|------------------------------------------|----------------------|-----------------------|-------------------|---------------------------|
| 0 < period ≤ 90                          | 399                  | 967                   | 1.54 (1.35-1.75)* | 1.36 (1.19-1.57)*         |
| 90 < period ≤ 180                        | 147                  | 356                   | 1.54 (1.26-1.88)  | 1.27 (1.02-1.58)*         |
| 180 < period ≤ 1000                      | 534                  | 1180                  | 1.69 (1.50-1.89)* | 1.48 (1.30-1.68)*         |
| 1000 > period                            | 662                  | 1532                  | 1.61 (1.45-1.79)* | 1.44 (1.28-1.62)*         |
| <b>Cumulative zotepine use (days)</b>    |                      |                       |                   |                           |
| nonusers                                 | 2292                 | 7375                  | 1                 | 1                         |
| 0 < period ≤ 90                          | 319                  | 743                   | 1.38 (1.20-1.59)* | 1.26 (1.08-1.47)*         |
| 90 < period ≤ 180                        | 120                  | 265                   | 1.46 (1.17-1.82)* | 1.27 (0.99-1.63)          |
| 180 < period ≤ 1000                      | 310                  | 770                   | 1.30 (1.13-1.49)* | 1.16 (1.00-1.36)*         |
| 1000 > period                            | 370                  | 1080                  | 1.11 (0.97-1.26)  | 1.00 (0.87-1.15)          |
| <b>Cumulative risperidone use (days)</b> |                      |                       |                   |                           |
| nonusers                                 | 896                  | 3056                  | 1                 | 1                         |
| 0 < period ≤ 90                          | 396                  | 1078                  | 1.26 (1.09-1.44)* | 1.14 (0.98-1.33)          |
| 90 < period ≤ 180                        | 207                  | 511                   | 1.39 (1.16-1.66)* | 1.26 (1.03-1.53)*         |
| 180 < period ≤ 1000                      | 733                  | 2028                  | 1.24 (1.10-1.38)* | 1.12 (0.99-1.26)          |
| 1000 < period                            | 1179                 | 3560                  | 1.13 (1.03-1.25)* | 1.10 (0.99-1.23)          |

OR: odds ratio; C I: confidence interval; AOR: adjusted odds ratio; SGA: second generation antipsychotic.

<sup>a</sup>Adjusted for age, gender, diabetes mellitus, congestive heart failure, myocardial infarction, stroke, hyperlipidemia, hypercholesterolemia, hypertriglyceridemia, hypertension, and obesity.



1  
2  
3  
4  
5  
6  
7  
8  
9  
10  
11  
12  
13  
14  
15  
16  
17  
18  
19  
20  
21  
22  
23  
24  
25  
26  
27  
28  
29  
30  
31  
32  
33  
34  
35  
36  
37  
38  
39  
40  
41  
42  
43  
44  
45  
46  
47  
48  
49

For peer review only

# BMJ Open

## Second-generation antipsychotic medications and risk of chronic kidney disease in schizophrenia: A Case-Control Study in Taiwan

|                                 |                                                                                                                                                                                                                                      |
|---------------------------------|--------------------------------------------------------------------------------------------------------------------------------------------------------------------------------------------------------------------------------------|
| Journal:                        | <i>BMJ Open</i>                                                                                                                                                                                                                      |
| Manuscript ID                   | bmjopen-2017-019868.R1                                                                                                                                                                                                               |
| Article Type:                   | Research                                                                                                                                                                                                                             |
| Date Submitted by the Author:   | 24-Nov-2017                                                                                                                                                                                                                          |
| Complete List of Authors:       | Wang, Hsien-Yi ; Chi Mei Medical Center, Nephrology<br>Huang, Charles Lung-Cheng ; Chi Mei Medical Center, Psychiatry<br>Feng, I Jung ; Chi Mei Medical Center, Chi Mei Hospital, Department of Medical Research<br>Tsuang, Hui-Chun |
| <b>Primary Subject Heading</b>: | Epidemiology                                                                                                                                                                                                                         |
| Secondary Subject Heading:      | Pharmacology and therapeutics                                                                                                                                                                                                        |
| Keywords:                       | second-generation antipsychotics, chronic kidney disease, schizophrenia                                                                                                                                                              |
|                                 |                                                                                                                                                                                                                                      |

SCHOLARONE™  
Manuscripts

1  
2  
3 **Second-generation antipsychotic medications and risk of chronic**  
4 **kidney disease in schizophrenia: A case-control study in Taiwan**

5  
6 **Running title:** Antipsychotics and kidney disease  
7

8 Hsien-Yi Wang, Charles Lung-Cheng Huang, I Jung Feng, Hui-Chun Tsuang\*  
9

10  
11  
12  
13  
14  
15 **Address correspondence to:** Hui-Chun Tsuang, Center of General Education, School  
16 of Liberal Arts Education, Chang Jung Christian University, No. 1, Changda Rd.,  
17 Gueiren Dist., Tainan City 71101, Taiwan.  
18  
19  
20  
21  
22 Tel.: (+886) 6-278-5123; Fax: (+886) 6-278-5062; E-mail: hctsuang@gmail.com  
23  
24  
25

26 **Key words:** second-generation antipsychotics; chronic kidney disease; schizophrenia  
27  
28  
29  
30  
31  
32  
33  
34  
35  
36  
37  
38  
39  
40  
41  
42  
43  
44  
45  
46  
47  
48  
49  
50  
51  
52  
53  
54  
55  
56  
57  
58  
59  
60

## ABSTRACT

Objectives: The study aims to compare the risk of chronic renal diseases (CKD) between schizophrenic patients using first and second generation antipsychotics.

Setting: Datasets of 2000-2013 National Health Insurance in Taiwan were used.

Participants: The National Health Insurance reimbursement claims data have been transferred to and managed by the National Health Research Institute in Taiwan since 1996. We used the Psychiatric Inpatient Medical Claims database, a subset of the National Health Insurance Research Database, comprising a cohort of patients hospitalized for psychiatric disorders between 2000 and 2013 (n = 267807). The database included patients with at least one psychiatric inpatient record and one discharge diagnosis of mental disorders coded by the International Classification of Diseases, Ninth Revision (ICD-9) codes 290-319. The age of patients at first admission was restricted to 18-65 years.

Primary outcome: CKD (ICD-9 code 582, 583, 585, 586, 588) requiring hospitalization or three outpatient visits. The diagnosis of CKD follows the criteria of 'Kidney Disease: Improving Global Outcomes (KDIGO)' in Taiwan. CKD is defined as kidney damage as albumin-to-creatinine ratio >30 mg/g in two of three spot urine specimens, or glomerular filtration rate (GFR) <60 mL/min/1.73 m<sup>2</sup>, for 3 months or more.

Results: We found that the risks for CKD for those who used second generation antipsychotics longer cumulatively were higher than those who did not use second generation antipsychotics. Using nonusers, patients didn't have any second generation antipsychotics records, as reference group, the risks for CKD comparing those using second generation antipsychotics for 90 to 180 days with nonusers and those using second generation antipsychotics for more than 1000 days were 1.42 (1.06-1.91) and 1.30 (1.13-1.51), respectively.

Conclusions: The current study suggests the relationship between using second-generation antipsychotics and risk of CKD.

### Article summary:

#### Strengths:

- (1) We tracked subjects for period longer than 1000 days after the initial schizophrenia diagnosis day.
- (2) This is the first study investing the relationship between antipsychotics and risk of CKD in inpatients with schizophrenia.

#### Limitations:

- (1) The measurement of exposure, use of antipsychotic drugs, can only be estimated

1  
2  
3 by the existing dataset we used.

4 (2) Using existing dataset without personal identification, we cannot investigate all  
5 risk factors in the study.  
6

7 Bullet points: The risk of CKD of inpatients of schizophrenia deserves furthers  
8 investigation. Besides, the study of risk of CKD for schizophrenic patients might need  
9 longer tracking duration.  
10  
11  
12  
13  
14  
15  
16  
17  
18  
19  
20  
21  
22  
23  
24  
25  
26  
27  
28  
29  
30  
31  
32  
33  
34  
35  
36  
37  
38  
39  
40  
41  
42  
43  
44  
45  
46  
47  
48  
49  
50  
51  
52  
53  
54  
55  
56  
57  
58  
59  
60

## 1. Introduction

Schizophrenia is a chronic mental illness with lifetime prevalence rate around 1%[1-2]. Patients with schizophrenia have been shown to have an excess mortality, being 2 or 3 times as high as that in the general population[3-5]. Cardiovascular diseases have an increased prevalence among patients with schizophrenia[6]. Metabolic syndrome (MetS), a collection of visceral adiposity (measured by waist size), high fasting glucose, increased blood pressure, elevated triglyceride levels, and low high-density lipoprotein cholesterol levels[7], also seems to be a vital health problem to schizophrenia patients[8-9]. Furthermore, patients with schizophrenia are liable to develop diabetes mellitus (DM)[1, 10] and chronic kidney diseases (CKD)[11].

The introduction of second-generation antipsychotics in the early 1990s was initially associated with better quality of life, lower rate of relapse, and better tolerability than first-generation antipsychotics[12-14]. However, the superiority of second-generation antipsychotics has been criticized by subsequent studies[15-16]. For example, the association between weight gain and use of second-generation antipsychotics, clozapine in particular, has been reported[17].

More recent studies confirmed the above finding regarding to the concern of using second-generation antipsychotic medications. A study using the National Health Insurance Research Database in Taiwan[18] found that use of clozapine, quetiapine, olanzapine, zotepine, and risperidone was associated with increased risk of pneumonia. A nationwide German/Austrian Diabetes Survey, which recruiting 60,162 teenagers with type 1 diabetes, demonstrated that subjects treated with second-generation antipsychotics, risperidone in particular, showed higher BMI[19]. A national study[20] conducted in the US compared 107,551 youths using second-generation antipsychotics with 1,221,434 youths not using second-generation antipsychotics. The risk for incident diabetes mellitus was increased in youths taking second-generation antipsychotics. The risk was higher among those using ziprasidone and aripiprazole. However, the risk for incident type 2 diabetes mellitus was not associated with newer second-generation antipsychotics, quetiapine and olanzapine.

DM was one of risk factors to develop CKD[21]. In addition, schizophrenia has been shown to be associated with an increased risk of CKD in a nationwide study in Taiwan[11]. In order to provide a more comprehensive evaluation comparing the side effects of second- and first-generation antipsychotics, we consider CKD to be included as an outcome variable, too. A population based, nested case control study is carried out here by applying the large national psychiatric database, the Psychiatric Inpatient Medical Claims database.

## 2. Methods

### 2.1. Study subjects

Taiwan started a single-payer National Health Insurance program on March 1, 1995. The National Health Insurance reimbursement claims data have been transferred to and managed by the National Health Research Institute in Taiwan since 1996. The database includes medical claim files representative of the entire population in Taiwan. All investigators signed an agreement that guarantees patient confidentiality before using the data. We used the Psychiatric Inpatient Medical Claims database, a subset of the National Health Insurance Research Database, comprising a cohort of patients hospitalized for psychiatric disorders between 2000 and 2013 (n = 267807). The database included patients with at least one psychiatric inpatient record and one discharge diagnosis of mental disorders coded by the International Classification of Diseases, Ninth Revision (ICD-9) codes 290-319. The database includes patients' demographic characteristics, diagnoses, medical expenditures, and prescription claims data[22]. Each prescription record contains type of medication, dosage, time of prescription, and duration of drug supply. Information which could be used to identify beneficiaries and medical care providers were scrambled by the Bureau of National Health Insurance[23].

We enrolled patients with at least one psychiatric admission between 2000 and 2013 but no psychiatric admissions between 1996 and 1999 (n = 13644). The inclusion criteria for the study cohort was that one's diagnosis at each discharge fulfilled the principal diagnosis of schizophrenia (ICD-9 code 295.\*\*\*) if a patient had several psychiatric admissions. The age of patients at first admission was restricted to 18-65 years.

### 2.2. Case and control definition

Using the patients with CKD (ICD-9 code 582, 583, 585, 586, 588) requiring hospitalization or three outpatient visits as cases (n = 3411), we conducted a nested case-control study derived from the cohort. The date of hospitalization for CKD or the third outpatient visit was defined as the index date. The diagnosis of CKD follows the criteria of 'Kidney Disease: Improving Global Outcomes (KDIGO)' in Taiwan. CKD is defined as kidney damage as albumin-to-creatinine ratio >30 mg/g in two of three spot urine specimens, or glomerular filtration rate (GFR) <60 mL/min/1.73 m<sup>2</sup>, for 3 months or more. For each case, 3 matched control subjects were randomly selected from the same schizophrenia cohort. Control subjects were matched to the patients for age diagnosed with schizophrenia, gender, and the year diagnosed with schizophrenia. Each control was assigned the index date of the corresponding case. Patients diagnosed with CKD before the schizophrenia diagnosis date were excluded.

### 2.3. Measurement of exposure

The data of antipsychotic drug use was derived from the prescription files. The duration of treatment was calculated using the dispensed number of units and the dosing regimen for each patient. Second-generation antipsychotic drugs used in our study included clozapine, olanzapine, quetiapine, zotepine, risperidone, amisulpride, ziprasidone, aripiprazole, and paliperidone. First-generation antipsychotic drugs used in our study included chlorpromazine, levomepromazine, fluphenazine, perphenazine, trifluoperazine, thioridazine, pipotiazine, haloperidol, moperone, flupentixol, clopenthixol, chlorprothixene, pimozide, loxapine, sulpiride, clotiapine, and penfluridol. Because this study focused on the associations between the individual second-generation antipsychotic drug and the risk of CKD, all first-generation antipsychotic drugs were grouped together in the data analysis. The date of diagnosed CKD is defined as index date in this study. The follow up period is from the schizophrenia diagnosis date to the index date.

### 2.4. Covariates

Age and gender were controlled by the matching process of the study design.

### 2.5. Statistical analysis

For the comparisons of demographic between cases and controls, *t* test was used for continuous variables and  $\chi^2$  tests for discrete variables. Univariate and multivariable conditional logistic regressions were used to estimate the associations between the exposure to antipsychotic use and risk of CKD. Odds ratios (ORs) with 95% confidence intervals (CIs) were calculated. A p-value .05 was considered significant.

## 3. Results

We identified 3411 cases of CKD. The age and gender distributions of the cases and control subjects were well matched. The cases were more likely than controls to have comorbid conditions (Table 1).

Table 2 showed that 1364 cases (40.0%) and 3559 controls (34.8%) were nonusers of antipsychotics. Using nonusers as reference group, the adjusted odds ratios for those who used first generation antipsychotics alone and those who used both first and second generation antipsychotics were 0.76 and 0.64, respectively.

Table 3 showed that 303 cases and 1304 controls did not use any second



1  
2  
3 generation antipsychotics. Using nonusers as reference group, the risks for CKD  
4 comparing those using second generation antipsychotics for 90 to 180 days with  
5 nonusers and those using second generation antipsychotics for more than 1000 days  
6 were 1.42 and 1.30, respectively (table 3). Considering varied second generation  
7 antipsychotics individually, using nonusers as reference group, the risks for CKD  
8 varied from 1.14 to 1.48.  
9  
10  
11  
12

#### 13 4. Discussion

14 We found that the risks for CKD for those who used second generation  
15 antipsychotics longer cumulatively were higher than those who did not use second  
16 generation antipsychotics. In addition, those who used only first generation  
17 antipsychotics and those who used both first and second generation antipsychotics  
18 seemed to have lower risk for CKD.  
19  
20

21 Also using the dataset of Taiwan National Health Insurance, Tzeng et al.[11]  
22 found that neither first nor second generation antipsychotics increased the risk of  
23 CKD. However, the study design of Tzeng et al. and ours varied a lot. Firstly, we  
24 focused on in patients while Tzeng et al. recruited patients with a first-time diagnosis  
25 of schizophrenia. Secondly, subjects of Tzeng et al. were tracked for 3 years or the  
26 end of 2010 from the initial diagnosis date until date of CKD diagnosis. We tracked  
27 subjects for longer period with one group tracked for 180 – 1000 days and another for  
28 period longer than 1000 days.  
29  
30  
31  
32

33 The introduction of second-generation antipsychotics in the early 1990s was  
34 initially shown better quality of life, lower rate of relapse, and better tolerability than  
35 first-generation antipsychotics for patients of schizophrenia[13-14, 24] but has been  
36 criticized by other studies[15-16]. The risk of pneumonia in inpatients with  
37 schizophrenia was examined using the National Health Insurance Research Database  
38 in Taiwan from 2000 to 2008[18]. They found that current used of clozapine, one kind  
39 of second-generation antipsychotics, was associated with a dose-dependent increase in  
40 the risk of pneumonia for inpatients with schizophrenia. In addition, other kinds of  
41 second-generation antipsychotics, including quetiapine, olanzapine, zotepine, and  
42 risperidone, were associated with increased risk of pneumonia while no clear  
43 dose-dependent relationship was found. They suggested that patients with  
44 schizophrenia who used these antipsychotics to be monitored for pneumonia. Our  
45 study further suggests that inpatients with schizophrenia being monitored for CKD  
46 since we found that the risks for CKD for those who used second generation  
47 antipsychotics longer cumulatively were higher than those who did not use second  
48 generation antipsychotics. Similar to the findings of kuo et al., we did not see  
49 dose-dependent relationship second generation antipsychotics and risk of CKD.  
50  
51  
52  
53  
54  
55  
56  
57  
58  
59  
60

1  
2  
3 The increasing prevalence of end-stage renal disease (ESRD) has been a global  
4 challenge. In the US, chronic renal diseases are the nation's ninth leading cause of  
5 death[24]. In Taiwan, chronic renal diseases have been the eighth leading cause of  
6 death since 1997, and was still the tenth leading cause of death recently[25].  
7  
8 Meanwhile, the high prevalence of CKD might contribute to the high prevalence of  
9 ESRD in Taiwan[26]. Our finding that inpatients with schizophrenia who used second  
10 generation antipsychotics longer have higher risks for CKD than those who did not  
11 use second generation antipsychotics reminds this population being monitored for  
12 CKD.  
13  
14

15  
16 Some limitations need to be considered in the current study. First, because our  
17 data source is from a claim data set, it is hard to know how much medication each  
18 patient really take. Second, we can not include variables not captured in claim  
19 database, such as patients' lifestyle and family history. However, the current study  
20 suggests a hypothesis regarding the relationship between using second-generation  
21 antipsychotics and risk of CKD which warrants further study.  
22  
23

#### 24 25 Declaration of interest

26 All authors declare that they have no conflicts of interest.  
27  
28

#### 29 30 Contributors

31 Hui-Chun Tsuang and Hsien-Yi Wang initiated the study. Hui-Chun Tsuang,  
32 Hsien-Yi Wang and Charles Lung-Cheng Huang designed the study. I Jung Feng  
33 analyzed the data. Hui-Chun Tsuang wrote the manuscript and Hsien-Yi Wang,  
34 Charles Lung-Cheng Huang and I Jung Feng approved the final manuscript.  
35  
36  
37

#### 38 39 Acknowledgements

40 *The authors thank the Bureau of National Health Insurance and National Health*  
41 *Institutes for making available the databases for this study.*  
42  
43

#### 44 45 DATA SHARING STATEMENT

46 Datasets of National Health Insurance in Taiwan were used. All investigators should  
47 sign an agreement that guarantees patient confidentiality before using the data.  
48  
49

#### 50 51 References

- 52 1. Chien, I.C., Hsu, J.-H., Lin, C.-H., Bih, S.-H., Chou, Y.-J., Chou, P., 2009. Prevalence of  
53 diabetes in patients with schizophrenia in Taiwan: a population-based National  
54 Health Insurance study. *Schizophrenia Research* 111(1-3), 17-22.  
55  
56  
57  
58  
59

- 1
- 2
- 3 2. Hovatta, I., Terwilliger, J., Lichtermann, D., Mäkiyö, T., Suvisaari, J., Peltonen, L.,
- 4 Lönnqvist, J., 1997. Schizophrenia in the genetic isolate of Finland. *American*
- 5 *Journal of Medical Genetics* 74, 353-360.
- 6
- 7 3. Brown, S., 1997. Excess mortality of schizophrenia. A meta-analysis. *Br J Psychiatry*
- 8 171, 502-508.
- 9
- 10 4. Brown, S., Kim, M., Mitchell, C., Inskip, H., 2010. Twenty-five year mortality of a
- 11 community cohort with schizophrenia. *Br J Psychiatry* 196(116-121).
- 12
- 13 5. Osby, U., Correia, N., Brandt, L., Ekblom, A., Sparén, P., 2000. Time trends in
- 14 schizophrenia mortality in Stockholm county, Sweden: cohort study. *BMJ* 321,
- 15 483-484.
- 16
- 17 6. Capasso, R., Lineberry, T., Bostwick, J., Decker, P., St Sauver, J., 2008. Mortality in
- 18 schizophrenia and schizoaffective disorder: an Olmsted County, Minnesota
- 19 cohort: 1950-2005. *Schizophrenia Research* 98, 287-294.
- 20
- 21 7. Grundy, S., Cleeman, J., Daniels, S., Donato, K., Eckel, R., Franklin, B., Gordon, D.,
- 22 Krauss, R., Savage, P., Smith, S.J., Spertus, J., Costa, F., American Heart
- 23 Association; National Heart, L., and Blood Institute, 2005. Diagnosis and
- 24 management of the metabolic syndrome: an American Heart
- 25 Association/National Heart, Lung, and Blood Institute Scientific Statement.
- 26 *Circulation* 112, 2735-2752.
- 27
- 28 8. Correll, C., Detraux, J., De Lepeleire, J., De Hert, M., 2015. Effects of antipsychotics,
- 29 antidepressants and mood stabilizers on risk for physical diseases in people with
- 30 schizophrenia, depression and bipolar disorder. *World Psychiatry* 14(2), 119-136.
- 31
- 32 9. Manu, P., Dima, L., Shulman, M., Vancampfort, D., De Hert, M., Correll, C., 2015.
- 33 Weight gain and obesity in schizophrenia: epidemiology, pathobiology, and
- 34 management. *Acta Psychiatr Scand* 132(2), 97-108.
- 35
- 36 10. Saddichha, S., Manjunatha, N., Ameen, S., Akhtar, S., 2008. Diabetes and
- 37 schizophrenia - effect of disease or drug? Results from a randomized,
- 38 double-blind, controlled prospective study in first-episode schizophrenia. *Acta*
- 39 *Psychiatrica Scandinavica* 117(5), 342-347.
- 40
- 41 11. Tzeng, N., Hsu, Y., Ho, S., Kuo, Y., Lee, H., Yin, Y., Chen, H., Chen, W., Chu, W.,
- 42 Huang, H., 2015. Is schizophrenia associated with an increased risk of chronic
- 43 kidney disease? A nationwide matched-cohort study. *BMJ Open* 5, e006777.
- 44
- 45 12. Awad, A., Voruganti, L., 2004. Impact of atypical antipsychotics on quality of life in
- 46 patients with schizophrenia. *CNS Drugs* 18, 877-893.
- 47
- 48 13. Leucht, S., Barnes, T., Kissling, W., Engel, R., Correll, C., Kane, J., 2003a. Relapse
- 49 prevention in schizophrenia with new-generation antipsychotics: a systematic
- 50 review and exploratory meta-analysis of randomized, controlled trials. *Am J*
- 51 *Psychiatry* 160, 1209-1222.
- 52
- 53
- 54
- 55
- 56
- 57
- 58
- 59
- 60

14. Leucht, S., Wahlbeck, K., Hamann, J., Kissling, W., 2003b. New generation antipsychotics versus low-potency conventional antipsychotics: a systematic review and meta-analysis. *Lancet* 361, 1581-1589.
15. Jones, P., Barnes, T., Davies, L., Dunn, G., Lloyd, H., Hayhurst, K., Murray, R., Markwick, A., Lewis, S., 2006. Randomized controlled trial of the effect on Quality of Life of second- vs first-generation antipsychotic drugs in schizophrenia: Cost Utility of the Latest Antipsychotic Drugs in Schizophrenia Study (CUtLASS 1). *Arch Gen Psychiatry* 63, 1079-1087.
16. Lieberman, J., Stroup, T., McEvoy, J., Swartz, M., Rosenheck, R., Perkins, D., Keefe RS, Davis, S., Davis, C., Lebowitz, B., Severe, J., Hsiao, J., Investigators., C.A.T.o.I.E.C., 2005. Effectiveness of antipsychotic drugs in patients with chronic schizophrenia. *N Engl J Med* 353, 1209-1223.
17. Bai, Y., Lin, C., Chen, J., Chen, T., Su, T., Chou, P., 2011. Association of weight gain and metabolic syndrome in patients taking clozapine: an 8-year cohort study. *J Clin Psychiatry* 72, 751-756.
18. Kuo, C., Yang, S., Liao, Y., Chen, W., Lee, W., Shau, W., Chang, Y., Tsai, S., Chen, C., 2013. Second-generation antipsychotic medications and risk of pneumonia in schizophrenia. *Schizophr Bull* 39, 648-657.
19. Galler, A., Bollow, E., Meusers, M., Bartus, B., Näke, A., Haberland, H., Schober, E., Holl, R., Mellitus., G.F.M.o.E.a.R.B.C.N.D., 2015. Comparison of glycemic and metabolic control in youth with type 1 diabetes with and without antipsychotic medication: analysis from the nationwide German/Austrian Diabetes Survey (DPV). *Diabetes Care* 38(6), 1051-1057.
20. Rubin, D., Kreider, A., Matone, M., Huang, Y., Feudtner, C., Ross, M., Localio, A., 2015. Risk for incident diabetes mellitus following initiation of second-generation antipsychotics among Medicaid-enrolled youths. *JAMA Pediatr* 169(4), e150285.
21. Hwang, S., Tsai, J., Chen, H., 2010. Epidemiology, impact and preventive care of chronic kidney disease in Taiwan. *Nephrology (Carlton) Suppl* 2, 3-9.
22. Gau, C., Chang, C., Tsai, F., Chao, P., Gau, S., 2010. Association between mood stabilizers and hypothyroidism in patients with bipolar disorders: a nested, matched case-control study. *Bipolar Disord* 12, 253-263.
23. Gau, S., Chung, C., Gau, C., 2008. A pharmaco-economic analysis of atypical antipsychotics and haloperidol in first-episode schizophrenic patients in taiwan. *J Clin Psychopharmacol* 28, 271-278.
24. Arias, E., Anderson, R., Kung, H., Murphy, S., Kochanek, K., 2003. Deaths: final data for 2001. *Natl Vital Stat Rep* 52(3), 1-115.
25. Department of Health, 2017. Department of Health: Health and Vital Statistics

1  
2  
3  
4  
5  
6  
7  
8  
9  
10  
11  
12  
13  
14  
15  
16  
17  
18  
19  
20  
21  
22  
23  
24  
25  
26  
27  
28  
29  
30  
31  
32  
33  
34  
35  
36  
37  
38  
39  
40  
41  
42  
43  
44  
45  
46  
47  
48  
49  
50  
51  
52  
53  
54  
55  
56  
57  
58  
59  
60

Republic of China 2017, Taiwan, ROC.

26. Hsu, C., Hwang, S., Wen, C., Chang, H., Chen, T., Shiu, R., Horng, S., Chang, Y., Yang, W., 2006. High prevalence and low awareness of CKD in Taiwan: a study on the relationship between serum creatinine and awareness from a nationally representative survey. *Am J Kidney Dis* 48, 727-738.

For peer review only

**Table 1** Basic characteristics of the study population

| Characteristic                       | Cases (n = 3411) n (%) | Controls (n = 10,233) n (%) | p        |
|--------------------------------------|------------------------|-----------------------------|----------|
| Age (mean ± SD years)                | 41.1 ± 10.2            | 41.1 ± 10.2                 | 0.999    |
| Male                                 | 1871 (54.9)            | 5613 (54.9)                 | > 0.999  |
| Follow-up duration (mean ± SD years) | 7.71 ± 4.71            | 7.71 ± 4.71                 | 0.971    |
| Comorbidities                        |                        |                             |          |
| Diabetes mellitus                    | 1299 (38.1)            | 1006 (9.8)                  | < 0.0001 |
| Congestive heart failure             | 207 (6.1)              | 86 (0.8)                    | < 0.0001 |
| Myocardial infarction                | 41 (1.2)               | 23 (0.2)                    | < 0.0001 |
| Stroke                               | 220 (6.5)              | 195 (1.9)                   | < 0.0001 |
| Hyperlipidemia                       | 502 (14.7)             | 433 (4.2)                   | < 0.0001 |
| Hypercholesterolemia                 | 111 (3.3)              | 90 (0.9)                    | < 0.0001 |
| Hypertriglyceridemia                 | 86 (2.5)               | 62 (0.6)                    | < 0.0001 |
| Hypertension                         | 1232 (36.1)            | 1147 (11.2)                 | < 0.0001 |
| Obesity                              | 49 (1.4)               | 37 (0.4)                    | < 0.0001 |

SD: standard deviation.

1  
2  
3  
4  
5  
6  
7  
8  
9  
10  
11  
12  
13  
14  
15  
16  
17  
18  
19  
20  
21  
22  
23  
24  
25  
26  
27  
28  
29  
30  
31  
32  
33  
34  
35  
36  
37  
38  
39  
40  
41  
42  
43  
44  
45  
46  
47

**Table 2** Comparison of crude and adjusted odds ratio for CKD among types of antipsychotics by conditional logistic regression

| Drug used   | CKD cases (n = 3411) | Controls (n = 10,233) | OR (95% CI)      | p-value | AOR <sup>a</sup> (95% CI) | p-value |
|-------------|----------------------|-----------------------|------------------|---------|---------------------------|---------|
| Nonusers    | 3                    | 17                    | 0.76 (0.22-2.59) | 0.6570  | 0.53 (0.13-2.21)          | 0.3857  |
| FGA alone   | 300                  | 1278                  | 1                |         | 1                         | -       |
| SGA alone   | 26                   | 102                   | 1.10 (0.70-1.72) | 0.6920  | 1.06 (0.65-1.74)          | 0.8068  |
| Combination | 3082                 | 8827                  | 1.50 (1.32-1.71) | <.0001  | 1.28 (1.11-1.47)          | .0009   |

OR: odds ratio; C I: confidence interval; AOR: adjusted odds ratio; FGA: first generation antipsychotic; SGA: second generation antipsychotic.

<sup>a</sup>Adjusted for age, gender, diabetes mellitus, congestive heart failure, myocardial infarction, stroke, hyperlipidemia, hypercholesterolemia, hypertriglyceridemia, hypertension, and obesity.

**Table 3** Overall cumulative period of using second generation antipsychotics

| Period of SGA use                       | CKD cases<br>(n = 3411) | Controls<br>(n = 10,233) | OR (95% CI)      | p-value | AOR <sup>a</sup> (95% CI) | p-value |
|-----------------------------------------|-------------------------|--------------------------|------------------|---------|---------------------------|---------|
| <b>Cumulative SGA use</b>               |                         |                          |                  |         |                           |         |
| nonusers                                | 303                     | 1304                     | 1                |         | 1                         |         |
| 0 < period ≤ 90                         | 177                     | 552                      | 1.38 (1.12-1.71) | 0.0026  | 1.20 (0.95-1.51)          | 0.1247  |
| 90 < period ≤ 180                       | 92                      | 241                      | 1.65 (1.26-2.16) | 0.0003  | 1.42 (1.06-1.91)          | 0.0208  |
| 180 < period ≤ 1000                     | 409                     | 1271                     | 1.39 (1.17-1.64) | 0.0001  | 1.19 (0.99-1.43)          | 0.0654  |
| 1000 > period                           | 2430                    | 6865                     | 1.53 (1.34-1.75) | <.0001  | 1.30 (1.13-1.51)          | 0.0004  |
| <b>Cumulative clozapine use (days)</b>  |                         |                          |                  |         |                           |         |
| nonusers                                | 2318                    | 7215                     | 1                |         | 1                         |         |
| 0 < period ≤ 90                         | 183                     | 351                      | 1.63 (1.35-1.96) | <.0001  | 1.48 (1.20-1.81)          | 0.0002  |
| 90 < period ≤ 180                       | 49                      | 140                      | 1.09 (0.79-1.52) | 0.6057  | 0.91 (0.63-1.32)          | 0.6281  |
| 180 < period ≤ 1000                     | 178                     | 549                      | 1.01 (0.85-1.20) | 0.9091  | 0.94 (0.77-1.14)          | 0.5099  |
| 1000 > period                           | 683                     | 1978                     | 1.08 (0.98-1.19) | 0.1456  | 1.14 (1.02-1.27)          | 0.0181  |
| <b>Cumulative olanzapine use (days)</b> |                         |                          |                  |         |                           |         |
| nonusers                                | 2046                    | 6465                     | 1                |         | 1                         |         |
| 0 < period ≤ 90                         | 396                     | 1018                     | 1.23 (1.09-1.40) | 0.0012  | 1.18 (1.02-1.35)          | 0.0225  |
| 90 < period ≤ 180                       | 156                     | 344                      | 1.44 (1.18-1.75) | 0.0003  | 1.37 (1.11-1.70)          | 0.0039  |
| 180 < period ≤ 1000                     | 401                     | 1038                     | 1.22 (1.08-1.39) | 0.0017  | 1.15 (1.00-1.32)          | 0.0561  |
| 1000 > period                           | 412                     | 1368                     | 0.95 (0.85-1.08) | 0.4401  | 1.05 (0.92-1.19)          | 0.4954  |



| Period of SGA use                        | CKD cases<br>(n = 3411) | Controls<br>(n = 10,233) | OR (95% CI)      | p-value | AOR <sup>a</sup> (95% CI) | p-value |
|------------------------------------------|-------------------------|--------------------------|------------------|---------|---------------------------|---------|
| <b>Cumulative quetiapine use (days)</b>  |                         |                          |                  |         |                           |         |
| nonusers                                 | 1669                    | 6198                     | 1                |         | 1                         |         |
| 0 < period ≤ 90                          | 399                     | 967                      | 1.54 (1.35-1.75) | <.0001  | 1.36 (1.19-1.57)          | <.0001  |
| 90 < period ≤ 180                        | 147                     | 356                      | 1.54 (1.26-1.88) | <.0001  | 1.27 (1.02-1.58)          | 0.0358  |
| 180 < period ≤ 1000                      | 534                     | 1180                     | 1.69 (1.50-1.89) | <.0001  | 1.48 (1.30-1.68)          | <.0001  |
| 1000 > period                            | 662                     | 1532                     | 1.61 (1.45-1.79) | <.0001  | 1.44 (1.28-1.62)          | <.0001  |
| <b>Cumulative zotepine use (days)</b>    |                         |                          |                  |         |                           |         |
| nonusers                                 | 2292                    | 7375                     | 1                |         | 1                         |         |
| 0 < period ≤ 90                          | 319                     | 743                      | 1.38 (1.20-1.59) | <.0001  | 1.26 (1.08-1.47)          | 0.0038  |
| 90 < period ≤ 180                        | 120                     | 265                      | 1.46 (1.17-1.82) | 0.0008  | 1.27 (0.99-1.63)          | 0.0592  |
| 180 < period ≤ 1000                      | 310                     | 770                      | 1.30 (1.13-1.49) | 0.0003  | 1.16 (1.00-1.36)          | 0.0572  |
| 1000 > period                            | 370                     | 1080                     | 1.11 (0.97-1.26) | 0.1240  | 1.00 (0.87-1.15)          | 0.9854  |
| <b>Cumulative risperidone use (days)</b> |                         |                          |                  |         |                           |         |
| nonusers                                 | 896                     | 3056                     | 1                |         | 1                         |         |
| 0 < period ≤ 90                          | 396                     | 1078                     | 1.26 (1.09-1.44) | 0.0012  | 1.14 (0.98-1.33)          | 0.0927  |
| 90 < period ≤ 180                        | 207                     | 511                      | 1.39 (1.16-1.66) | 0.0003  | 1.26 (1.03-1.53)          | 0.0220  |
| 180 < period ≤ 1000                      | 733                     | 2028                     | 1.24 (1.10-1.38) | 0.0002  | 1.12 (0.99-1.26)          | 0.0845  |
| 1000 < period                            | 1179                    | 3560                     | 1.13 (1.03-1.25) | 0.0148  | 1.10 (0.99-1.23)          | 0.0756  |

OR: odds ratio; C I: confidence interval; AOR: adjusted odds ratio; SGA: second generation antipsychotic.

1  
2  
3  
4  
5  
6  
7 <sup>a</sup>Adjusted for age, gender, diabetes mellitus, congestive heart failure, myocardial infarction, stroke, hyperlipidemia, hypercholesterolemia,  
8  
9  
10 hypertriglyceridemia, hypertension, and obesity.  
11  
12  
13  
14  
15  
16  
17  
18  
19  
20  
21  
22  
23  
24  
25  
26  
27  
28  
29  
30  
31  
32  
33  
34  
35  
36  
37  
38  
39  
40  
41  
42  
43  
44  
45  
46  
47

For peer review only

STROBE Statement—Checklist of items that should be included in reports of *case-control studies*

|                           | Item No | Page/line                              |
|---------------------------|---------|----------------------------------------|
| <b>Title and abstract</b> | 1       | (a) 1/1<br>(b) Page2                   |
| <b>Introduction</b>       |         |                                        |
| Background/rationale      | 2       | 4/1-4/33                               |
| Objectives                | 3       | 4/33-4/35                              |
| <b>Methods</b>            |         |                                        |
| Study design              | 4       | 4/35-4/37                              |
| Setting                   | 5       | 5/2-5/11                               |
| Participants              | 6       | (a) 5/2-5/6; 5/8-5/11<br>(b) 5/34-5/38 |
| Variables                 | 7       | 6/3-6/14                               |
| Data sources/ measurement | 8       | 5/3-5/8; 6/8-6/19                      |
| Bias                      | 9       | 6/19-6/20                              |
| Study size                | 10      | 5/16-5/17; 5/24-5/25                   |
| Quantitative variables    | 11      | 6/8-6/19                               |
| Statistical methods       | 12      | 6/22-6/28                              |
| <b>Results</b>            |         |                                        |
| Participants              | 13      | 6/31-6/32                              |
| Descriptive data          | 14      | 6/32-6/33                              |
| Outcome data              | 15      | 6/35-6/38                              |
| Main results              | 16      | 6/39-7/4                               |

1  
2 Other analyses 17 7/4-7/6  
3

---

4 **Discussion**

5 Key results 18 7/9-7/13

6 Limitations 19 8/10-8/13

7 Interpretation 20 7/14-7/39

8 Generalisability 21 8/1-8/9  
9

---

10 **Other information**

11 Funding 22 CMFHR 10537; Source of funding: Chi-Mei Medical Center. The role of the funder: Three of  
12 the authors work in Chi-Mei Medical Center.  
13  
14

15  
16  
17  
18  
19  
20  
21  
22  
23  
24  
25  
26  
27  
28  
29  
30  
31  
32  
33  
34  
35  
36  
37  
38  
39  
40  
41  
42  
43  
44  
45  
46  
47  
48  
49  
50  
51  
52  
53  
54  
55  
56  
57  
58  
59  
60

For peer review only

# BMJ Open

## Second-generation antipsychotic medications and risk of chronic kidney disease in schizophrenia: population based nested case-control study

|                                 |                                                                                                                                                                                                                                      |
|---------------------------------|--------------------------------------------------------------------------------------------------------------------------------------------------------------------------------------------------------------------------------------|
| Journal:                        | <i>BMJ Open</i>                                                                                                                                                                                                                      |
| Manuscript ID                   | bmjopen-2017-019868.R2                                                                                                                                                                                                               |
| Article Type:                   | Research                                                                                                                                                                                                                             |
| Date Submitted by the Author:   | 10-Jan-2018                                                                                                                                                                                                                          |
| Complete List of Authors:       | Wang, Hsien-Yi ; Chi Mei Medical Center, Nephrology<br>Huang, Charles Lung-Cheng ; Chi Mei Medical Center, Psychiatry<br>Feng, I Jung ; Chi Mei Medical Center, Chi Mei Hospital, Department of Medical Research<br>Tsuang, Hui-Chun |
| <b>Primary Subject Heading</b>: | Epidemiology                                                                                                                                                                                                                         |
| Secondary Subject Heading:      | Pharmacology and therapeutics                                                                                                                                                                                                        |
| Keywords:                       | second-generation antipsychotics, chronic kidney disease, schizophrenia                                                                                                                                                              |
|                                 |                                                                                                                                                                                                                                      |

SCHOLARONE™  
Manuscripts

1  
2  
3 **Second-generation antipsychotic medications and risk of chronic**  
4 **kidney disease in schizophrenia: population based nested case-control**  
5 **study**  
6

7 **Running title:** Antipsychotics and kidney disease  
8  
9

10 Hsien-Yi Wang, Charles Lung-Cheng Huang, I Jung Feng, Hui-Chun Tsuang\*  
11  
12  
13  
14  
15  
16

17 **Address correspondence to:** Hui-Chun Tsuang, Center of General Education, School  
18 of Liberal Arts Education, Chang Jung Christian University, No. 1, Changda Rd.,  
19 Gueiren Dist., Tainan City 71101, Taiwan.  
20  
21

22  
23 Tel.: (+886) 6-278-5123; Fax: (+886) 6-278-5062; E-mail: hctsuang@gmail.com  
24  
25  
26  
27

28 **Key words:** second-generation antipsychotics; chronic kidney disease; schizophrenia  
29  
30  
31  
32  
33  
34  
35  
36  
37  
38  
39  
40  
41  
42  
43  
44  
45  
46  
47  
48  
49  
50  
51  
52  
53  
54  
55  
56  
57  
58  
59  
60

## ABSTRACT

**Objectives:** The study aims to compare the risk of chronic renal diseases (CKD) between schizophrenic patients using first and second generation antipsychotics.

**Setting:** Datasets of 2000-2013 National Health Insurance in Taiwan were used.

**Participants:** The National Health Insurance reimbursement claims data have been transferred to and managed by the National Health Research Institute in Taiwan since 1996. We used the Psychiatric Inpatient Medical Claims database, a subset of the National Health Insurance Research Database, comprising a cohort of patients hospitalized for psychiatric disorders between 2000 and 2013 (n = 267807). The database included patients with at least one psychiatric inpatient record and one discharge diagnosis of mental disorders coded by the International Classification of Diseases, Ninth Revision (ICD-9) codes 290-319. The age of patients at first admission was restricted to 18-65 years.

**Primary outcome:** CKD (ICD-9 code 582, 583, 585, 586, 588) requiring hospitalization or three outpatient visits. The diagnosis of CKD follows the criteria of 'Kidney Disease: Improving Global Outcomes (KDIGO)' in Taiwan. CKD is defined as kidney damage as albumin-to-creatinine ratio >30 mg/g in two of three spot urine specimens, or glomerular filtration rate (GFR) <60 mL/min/1.73 m<sup>2</sup>, for 3 months or more.

**Results:** We found that the risks for CKD for those who used second generation antipsychotics longer cumulatively were higher than those who did not use second generation antipsychotics. Using nonusers, patients didn't have any second generation antipsychotics records, as reference group, the risks for CKD comparing those using second generation antipsychotics for 90 to 180 days with nonusers and those using second generation antipsychotics for more than 1000 days were 1.42 (1.06-1.91) and 1.30 (1.13-1.51), respectively.

**Conclusions:** The current study suggests the relationship between using second-generation antipsychotics and risk of CKD.

### Article summary:

#### Strengths:

- (1) We tracked subjects for period longer than 1000 days after the initial schizophrenia diagnosis day.
- (2) This is the first study investing the relationship between antipsychotics and risk of CKD in inpatients with schizophrenia.

#### Limitations:

- (1) The measurement of exposure, use of antipsychotic drugs, can only be estimated by the existing dataset we used.

1  
2  
3 (2) Using existing dataset without personal identification, we cannot investigate all  
4 risk factors in the study.

5  
6 Bullet points: The risk of CKD of inpatients of schizophrenia deserves furthers  
7 investigation. Besides, the study of risk of CKD for schizophrenic patients might need  
8 longer tracking duration.  
9

10  
11  
12  
13  
14  
15  
16  
17  
18  
19  
20  
21  
22  
23  
24  
25  
26  
27  
28  
29  
30  
31  
32  
33  
34  
35  
36  
37  
38  
39  
40  
41  
42  
43  
44  
45  
46  
47  
48  
49  
50  
51  
52  
53  
54  
55  
56  
57  
58  
59  
60

For peer review only



## 1. Introduction

Schizophrenia is a chronic mental illness with lifetime prevalence rate around 1%[1-2]. Patients with schizophrenia have been shown to have an excess mortality, being 2 or 3 times as high as that in the general population[3-5]. Cardiovascular diseases have an increased prevalence among patients with schizophrenia[6]. Metabolic syndrome (MetS), a collection of visceral adiposity (measured by waist size), high fasting glucose, increased blood pressure, elevated triglyceride levels, and low high-density lipoprotein cholesterol levels[7], also seems to be a vital health problem to schizophrenia patients[8-9]. Furthermore, patients with schizophrenia are liable to develop diabetes mellitus (DM)[1, 10] and chronic kidney diseases (CKD)[11].

The introduction of second-generation antipsychotics in the early 1990s was initially associated with better quality of life, lower rate of relapse, and better tolerability than first-generation antipsychotics[12-14]. However, the superiority of second-generation antipsychotics has been criticized by subsequent studies[15-16]. For example, the association between weight gain and use of second-generation antipsychotics, clozapine in particular, has been reported[17].

More recent studies confirmed the above finding regarding to the concern of using second-generation antipsychotic medications. A study using the National Health Insurance Research Database in Taiwan[18] found that use of clozapine, quetiapine, olanzapine, zotepine, and risperidone was associated with increased risk of pneumonia. A nationwide German/Austrian Diabetes Survey, which recruiting 60,162 teenagers with type 1 diabetes, demonstrated that subjects treated with second-generation antipsychotics, risperidone in particular, showed higher BMI[19]. A national study[20] conducted in the US compared 107,551 youths using second-generation antipsychotics with 1,221,434 youths not using second-generation antipsychotics. The risk for incident diabetes mellitus was increased in youths taking second-generation antipsychotics. The risk was higher among those using ziprasidone and aripiprazole. However, the risk for incident type 2 diabetes mellitus was not associated with newer second-generation antipsychotics, quetiapine and olanzapine.

DM was one of risk factors to develop CKD[21]. Besides, schizophrenia has been shown to be associated with an increased risk of CKD in a nationwide study in Taiwan[11]. Therefore, we consider CKD to be included as an outcome variable, too. A population based, nested case control study is carried out here by applying the large national psychiatric database, the Psychiatric Inpatient Medical Claims database. Meanwhile, to provide a comprehensive picture of the risk of using antipsychotics, we compare people who used both first and second generation antipsychotics, people who use only second generation antipsychotics with those who used only first generation

1  
2  
3 drugs in our study.  
4  
5

## 6 **2. Methods**

### 7 *2.1. Study subjects*

8  
9 Taiwan started a single-payer National Health Insurance program on March 1,  
10 1995. The National Health Insurance reimbursement claims data have been  
11 transferred to and managed by the National Health Research Institute in Taiwan since  
12 1996. The database includes medical claim files representative of the entire  
13 population in Taiwan. All investigators signed an agreement that guarantees patient  
14 confidentiality before using the data. We used the Psychiatric Inpatient Medical  
15 Claims database, a subset of the National Health Insurance Research Database,  
16 comprising a cohort of patients hospitalized for psychiatric disorders between 2000  
17 and 2013 (n = 267807). The database included patients with at least one psychiatric  
18 inpatient record and one discharge diagnosis of mental disorders coded by the  
19 International Classification of Diseases, Ninth Revision (ICD-9) codes 290-319. The  
20 database includes patients' demographic characteristics, diagnoses, medical  
21 expenditures, and prescription claims data[22]. Each prescription record contains type  
22 of medication, dosage, time of prescription, and duration of drug supply. Information  
23 which could be used to identify beneficiaries and medical care providers were  
24 scrambled by the Bureau of National Health Insurance[23].  
25  
26  
27  
28  
29  
30

31 We enrolled patients with at least one psychiatric admission between 2000 and  
32 2013 but no psychiatric admissions between 1996 and 1999 (n = 13644). The  
33 inclusion criteria for the study cohort was that one's diagnosis at each discharge  
34 fulfilled the principal diagnosis of schizophrenia (ICD-9 code 295.\*\*\*) if a patient had  
35 several psychiatric admissions. The age of patients at first admission was restricted to  
36 18-65 years.  
37  
38  
39  
40

### 41 *2.2. Case and control definition*

42 In this study we conducted a nested case-control study derived from the cohort.  
43 Patients with CKD (ICD-9 code 582, 583, 585, 586, 588) requiring hospitalization or  
44 three outpatient visits were selected as cases (n = 3411). The date of first  
45 hospitalization for CKD or the third outpatient visit was defined as the index date.  
46 The diagnosis of CKD follows the criteria of 'Kidney Disease: Improving Global  
47 Outcomes (KDIGO)' in Taiwan. CKD is defined as kidney damage as  
48 albumin-to-creatinine ratio >30 mg/g in two of three spot urine specimens, or  
49 glomerular filtration rate (GFR) <60 mL/min/1.73 m<sup>2</sup>, for 3 months or more. For each  
50 case, 3 matched control subjects were randomly selected from the same schizophrenia  
51 patients who have not been diagnosed with CKD before index date. Control subjects  
52  
53  
54  
55  
56  
57  
58  
59  
60

1  
2  
3 were matched to the patients for age diagnosed with schizophrenia, gender, and the  
4 year diagnosed with schizophrenia. Each control was assigned the index date of the  
5 corresponding case. Patients diagnosed with CKD before the schizophrenia diagnosis  
6 date were excluded.  
7  
8  
9

### 10 11 *2.3. Measurement of exposure*

12  
13 The data of antipsychotic drug use was derived from the prescription files. The  
14 duration of treatment was calculated using the dispensed number of units and the  
15 dosing regimen for each patient. Second-generation antipsychotic drugs used in our  
16 study included clozapine, olanzapine, quetiapine, zotepine, risperidone, amisulpride,  
17 ziprasidone, aripiprazole, and paliperidone. First-generation antipsychotic drugs used  
18 in our study included chlorpromazine, levomepromazine, fluphenazine, perphenazine,  
19 trifluoperazine, thioridazine, pipotiazine, haloperidol, moperone, flupentixol,  
20 clopenthixol, chlorprothixene, pimozide, loxapine, sulpiride, clotiapine, and  
21 penfluridol. Because this study focused on the associations between the individual  
22 second-generation antipsychotic drug and the risk of CKD, all first-generation  
23 antipsychotic drugs were grouped together in the data analysis. The follow up period  
24 is from the schizophrenia diagnosis date to the index date.  
25  
26  
27  
28  
29  
30  
31  
32

### 33 *2.4. Covariates*

34 Age, gender and the duration of schizophrenia were Comorbidity factors, such as  
35 diabetes mellitus, congestive heart failure, myocardial infarction, stroke,  
36 hyperlipidemia, hypercholesterolemia, hypertriglyceridemia, hypertension, and  
37 obesity, were entered into adjusted model controlled by the matching process of the  
38 study design.  
39  
40  
41

### 42 *2.5. Statistical analysis*

43  
44 For the comparisons of demographic between cases and controls, *t* test was used  
45 for continuous variables and  $\chi^2$  tests for discrete variables. Univariate and  
46 multivariable conditional logistic regressions were used to estimate the associations  
47 between the exposure to antipsychotic use and risk of CKD. Comorbidity factors,  
48 such as diabetes mellitus, congestive heart failure, myocardial infarction, stroke,  
49 hyperlipidemia, hypercholesterolemia, hypertriglyceridemia, hypertension, and  
50 obesity, were entered into adjusted model. Odds ratios (ORs) with 95% confidence  
51 intervals (CIs) were calculated. A p-value .05 was considered significant.  
52  
53  
54  
55  
56  
57  
58  
59  
60

### 3. Results

A total of 3411 patients with CKD and 10233 matched controls were enrolled in this study. Age, gender and the duration of schizophrenia of the cases and control subjects were well matched. The characteristics of patients with CKD and matched controls were compared and showed in Table 1. The cases were more likely to have comorbid conditions than controls (Table 1).

More than 85% subjects were received both FGA and SGA medications. Case and control groups separately include 3082 (90.4%) and 8827 (86.3%) subjects (Table 2). Taking patients using FGA only as reference group, the adjusted ORs [95%CI] for those who used no FGA and no SGA, SGA alone, both FGA and SGA were 0.53 [0.13-2.21], 1.06 [0.65-1.74], 1.28 [1.11-1.47] respectively (Table 2). Patients used both FGA and SGA have significant greater risk than patients used FGA only ( $p=0.0009$ ) (Table 2).

With the adjustment of comorbidity factors, the analysis results showed that greater risks of CKD for patients who received SGA than patients didn't receive, as the reference group. Especially, patients cumulatively used SGA 90-180 days and more than 1000 days have 42% and 30% significantly higher odds of developing CKD compared to reference group (adjusted OR [95%CI]=1.42 [1.06-1.91], 1.30 [1.13-1.51]) (Table 3). The adjusted ORs for patients exposed for 0 - 90 days and 180 - 1000 days were close to the margin of statistical significance,  $p$ -value=0.1236 and 0.0646 separately (Table 3). Patients used olanzapine, quetiapine, zotepine or risperidone all displayed greater odds of developing CKD than reference group. Patients with quetiapine exposure have statistically significant higher risk than the reference group.

### 4. Discussion

We found that the risks for CKD for those who used second generation antipsychotics longer cumulatively were higher than those who did not use second generation antipsychotics. In addition, those who used only first generation antipsychotics and those who used both first and second generation antipsychotics seemed to have lower risk for CKD.

Also using the dataset of Taiwan National Health Insurance, Tzeng et al. [11] found that neither first nor second generation antipsychotics increased the risk of CKD. However, the study design of Tzeng et al. and ours varied a lot. Firstly, we focused on in patients while Tzeng et al. recruited patients with a first-time diagnosis of schizophrenia. Secondly, subjects of Tzeng et al. were tracked for 3 years or the end of 2010 from the initial diagnosis date until date of CKD diagnosis. We tracked subjects for longer period with one group tracked for 180 - 1000 days and another for

1  
2  
3 period longer than 1000 days.

4 The introduction of second-generation antipsychotics in the early 1990s was  
5 initially shown better quality of life, lower rate of relapse, and better tolerability than  
6 first-generation antipsychotics for patients of schizophrenia[13-14, 24] but has been  
7 criticized by other studies[15-16]. The risk of pneumonia in inpatients with  
8 schizophrenia was examined using the National Health Insurance Research Database  
9 in Taiwan from 2000 to 2008[18]. They found that current used of clozapine, one kind  
10 of second-generation antipsychotics, was associated with a dose-dependent increase in  
11 the risk of pneumonia for inpatients with schizophrenia. In addition, other kinds of  
12 second-generation antipsychotics, including quetiapine, olanzapine, zotepine, and  
13 risperidone, were associated with increased risk of pneumonia while no clear  
14 dose-dependent relationship was found. They suggested that patients with  
15 schizophrenia who used these antipsychotics to be monitored for pneumonia. Our  
16 study further suggests that inpatients with schizophrenia being monitored for CKD  
17 since we found that the risks for CKD for those who used second generation  
18 antipsychotics longer cumulatively were higher than those who did not use second  
19 generation antipsychotics. Similar to the findings of kuo et al., we did not see  
20 dose-dependent relationship second generation antipsychotics and risk of CKD.  
21  
22  
23  
24  
25  
26  
27  
28

29 The increasing prevalence of end-stage renal disease (ESRD) has been a global  
30 challenge. In the US, chronic renal diseases are the nation's ninth leading cause of  
31 death[24]. In Taiwan, chronic renal diseases have been the eighth leading cause of  
32 death since 1997, and was still the tenth leading cause of death recently[25].  
33 Meanwhile, the high prevalence of CKD might contribute to the high prevalence of  
34 ESRD in Taiwan[26]. Our finding that inpatients with schizophrenia who used second  
35 generation antipsychotics longer have higher risks for CKD than those who did not  
36 use second generation antipsychotics reminds this population being monitored for  
37 CKD.  
38  
39  
40

41 Some limitations need to be considered in the current study. First, because our  
42 data source is from a claim data set, it is hard to know how much medication each  
43 patient really take. Second, we can not include variables not captured in claim  
44 database, such as patients' lifestyle and family history. However, the current study  
45 suggests a hypothesis regarding the relationship between using second-generation  
46 antipsychotics and risk of CKD which warrants further study.  
47  
48  
49  
50

#### 51 Declaration of interest

52 All authors declare that they have no conflicts of interest.  
53  
54

#### 55 Contributors

56  
57  
58  
59  
60

Hui-Chun Tsuang and Hsien-Yi Wang initiated the study. Hui-Chun Tsuang, Hsien-Yi Wang and Charles Lung-Cheng Huang designed the study. I Jung Feng analyzed the data. Hui-Chun Tsuang wrote the manuscript and Hsien-Yi Wang, Charles Lung-Cheng Huang and I Jung Feng approved the final manuscript.

#### Funding

The study was supported by Chi-Mei Medical Center (CMFHR 10537)

#### Acknowledgements

*The authors thank the Bureau of National Health Insurance and National Health Institutes for making available the databases for this study.*

#### DATA SHARING STATEMENT

Datasets of National Health Insurance in Taiwan were used. All investigators should sign an agreement that guarantees patient confidentiality before using the data.

#### References

1. Chien, I.C., Hsu, J.-H., Lin, C.-H., Bih, S.-H., Chou, Y.-J., Chou, P., 2009. Prevalence of diabetes in patients with schizophrenia in Taiwan: a population-based National Health Insurance study. *Schizophrenia Research* 111(1-3), 17-22.
2. Hovatta, I., Terwilliger, J., Lichtermann, D., Mäkiyö, T., Suvisaari, J., Peltonen, L., Lönnqvist, J., 1997. Schizophrenia in the genetic isolate of Finland. *American Journal of Medical Genetics* 74, 353-360.
3. Brown, S., 1997. Excess mortality of schizophrenia. A meta-analysis. *Br J Psychiatry* 171, 502-508.
4. Brown, S., Kim, M., Mitchell, C., Inskip, H., 2010. Twenty-five year mortality of a community cohort with schizophrenia. *Br J Psychiatry* 196(116-121).
5. Osby, U., Correia, N., Brandt, L., Ekbom, A., Sparén, P., 2000. Time trends in schizophrenia mortality in Stockholm county, Sweden: cohort study. *BMJ* 321, 483-484.
6. Capasso, R., Lineberry, T., Bostwick, J., Decker, P., St Sauver, J., 2008. Mortality in schizophrenia and schizoaffective disorder: an Olmsted County, Minnesota cohort: 1950-2005. *Schizophrenia Research* 98, 287-294.
7. Grundy, S., Cleeman, J., Daniels, S., Donato, K., Eckel, R., Franklin, B., Gordon, D., Krauss, R., Savage, P., Smith, S.J., Spertus, J., Costa, F., American Heart



- 1  
2  
3 Association; National Heart, L., and Blood Institute, 2005. Diagnosis and  
4 management of the metabolic syndrome: an American Heart  
5 Association/National Heart, Lung, and Blood Institute Scientific Statement.  
6 *Circulation* 112, 2735-2752.  
7  
8  
9 8. Correll, C., Detraux, J., De Lepeleire, J., De Hert, M., 2015. Effects of antipsychotics,  
10 antidepressants and mood stabilizers on risk for physical diseases in people with  
11 schizophrenia, depression and bipolar disorder. *World Psychiatry* 14(2), 119-136.  
12  
13 9. Manu, P., Dima, L., Shulman, M., Vancampfort, D., De Hert, M., Correll, C., 2015.  
14 Weight gain and obesity in schizophrenia: epidemiology, pathobiology, and  
15 management. *Acta Psychiatr Scand* 132(2), 97-108.  
16  
17 10. Saddichha, S., Manjunatha, N., Ameen, S., Akhtar, S., 2008. Diabetes and  
18 schizophrenia - effect of disease or drug? Results from a randomized,  
19 double-blind, controlled prospective study in first-episode schizophrenia. *Acta*  
20 *Psychiatrica Scandinavica* 117(5), 342-347.  
21  
22 11. Tzeng, N., Hsu, Y., Ho, S., Kuo, Y., Lee, H., Yin, Y., Chen, H., Chen, W., Chu, W.,  
23 Huang, H., 2015. Is schizophrenia associated with an increased risk of chronic  
24 kidney disease? A nationwide matched-cohort study. *BMJ Open* 5, e006777.  
25  
26 12. Awad, A., Voruganti, L., 2004. Impact of atypical antipsychotics on quality of life in  
27 patients with schizophrenia. *CNS Drugs* 18, 877-893.  
28  
29 13. Leucht, S., Barnes, T., Kissling, W., Engel, R., Correll, C., Kane, J., 2003a. Relapse  
30 prevention in schizophrenia with new-generation antipsychotics: a systematic  
31 review and exploratory meta-analysis of randomized, controlled trials. *Am J*  
32 *Psychiatry* 160, 1209-1222.  
33  
34 14. Leucht, S., Wahlbeck, K., Hamann, J., Kissling, W., 2003b. New generation  
35 antipsychotics versus low-potency conventional antipsychotics: a systematic  
36 review and meta-analysis. *Lancet* 361, 1581-1589.  
37  
38 15. Jones, P., Barnes, T., Davies, L., Dunn, G., Lloyd, H., Hayhurst, K., Murray, R.,  
39 Markwick, A., Lewis, S., 2006. Randomized controlled trial of the effect on  
40 Quality of Life of second- vs first-generation antipsychotic drugs in schizophrenia:  
41 Cost Utility of the Latest Antipsychotic Drugs in Schizophrenia Study (CUtLASS 1).  
42 *Arch Gen Psychiatry* 63, 1079-1087.  
43  
44 16. Lieberman, J., Stroup, T., McEvoy, J., Swartz, M., Rosenheck, R., Perkins, D., Keefe  
45 RS, Davis, S., Davis, C., Lebowitz, B., Severe, J., Hsiao, J., Investigators.,  
46 C.A.T.o.I.E.C., 2005. Effectiveness of antipsychotic drugs in patients with chronic  
47 schizophrenia. *N Engl J Med* 353, 1209-1223.  
48  
49 17. Bai, Y., Lin, C., Chen, J., Chen, T., Su, T., Chou, P., 2011. Association of weight gain  
50 and metabolic syndrome in patients taking clozapine: an 8-year cohort study. *J*  
51 *Clin Psychiatry* 72, 751-756.  
52  
53  
54  
55  
56  
57  
58  
59  
60

18. Kuo, C., Yang, S., Liao, Y., Chen, W., Lee, W., Shau, W., Chang, Y., Tsai, S., Chen, C., 2013. Second-generation antipsychotic medications and risk of pneumonia in schizophrenia. *Schizophr Bull* 39, 648-657.
19. Galler, A., Bollow, E., Meusers, M., Bartus, B., Näke, A., Haberland, H., Schober, E., Holl, R., Mellitus., G.F.M.o.E.a.R.B.C.N.D., 2015. Comparison of glycemetic and metabolic control in youth with type 1 diabetes with and without antipsychotic medication: analysis from the nationwide German/Austrian Diabetes Survey (DPV). *Diabetes Care* 38(6), 1051-1057.
20. Rubin, D., Kreider, A., Matone, M., Huang, Y., Feudtner, C., Ross, M., Localio, A., 2015. Risk for incident diabetes mellitus following initiation of second-generation antipsychotics among Medicaid-enrolled youths. *JAMA Pediatr* 169(4), e150285.
21. Hwang, S., Tsai, J., Chen, H., 2010. Epidemiology, impact and preventive care of chronic kidney disease in Taiwan. *Nephrology (Carlton) Suppl* 2, 3-9.
22. Gau, C., Chang, C., Tsai, F., Chao, P., Gau, S., 2010. Association between mood stabilizers and hypothyroidism in patients with bipolar disorders: a nested, matched case-control study. *Bipolar Disord* 12, 253-263.
23. Gau, S., Chung, C., Gau, C., 2008. A pharmaco-economic analysis of atypical antipsychotics and haloperidol in first-episode schizophrenic patients in taiwan. *J Clin Psychopharmacol* 28, 271-278.
24. Arias, E., Anderson, R., Kung, H., Murphy, S., Kochanek, K., 2003. Deaths: final data for 2001. *Natl Vital Stat Rep* 52(3), 1-115.
25. Department of Health, 2017. Department of Health: Health and Vital Statistics Republic of China 2017, Taiwan, ROC.
26. Hsu, C., Hwang, S., Wen, C., Chang, H., Chen, T., Shiu, R., Horng, S., Chang, Y., Yang, W., 2006. High prevalence and low awareness of CKD in Taiwan: a study on the relationship between serum creatinine and awareness from a nationally representative survey. *Am J Kidney Dis* 48, 727-738.



**Table 1** Basic characteristics of the study population

| Characteristic                           | Cases (n = 3411) n (%) | Controls (n = 10,233) n (%) |
|------------------------------------------|------------------------|-----------------------------|
| Age (mean $\pm$ SD years)                | 41.1 $\pm$ 10.2        | 41.1 $\pm$ 10.2             |
| Male                                     | 1871 (54.9)            | 5613 (54.9)                 |
| Follow-up duration (mean $\pm$ SD years) | 7.71 $\pm$ 4.71        | 7.71 $\pm$ 4.71             |
| Comorbidities                            |                        |                             |
| Diabetes mellitus***                     | 1299 (38.1)            | 1006 (9.8)                  |
| Congestive heart failure***              | 207 (6.1)              | 86 (0.8)                    |
| Myocardial infarction***                 | 41 (1.2)               | 23 (0.2)                    |
| Stroke***                                | 220 (6.5)              | 195 (1.9)                   |
| Hyperlipidemia***                        | 502 (14.7)             | 433 (4.2)                   |
| Hypercholesterolemia***                  | 111 (3.3)              | 90 (0.9)                    |
| Hypertriglyceridemia***                  | 86 (2.5)               | 62 (0.6)                    |
| Hypertension***                          | 1232 (36.1)            | 1147 (11.2)                 |
| Obesity***                               | 49 (1.4)               | 37 (0.4)                    |

SD: standard deviation.

\*\*\* < 0.0001

1  
2  
3  
4  
5  
6  
7  
8  
9  
10  
11  
12  
13  
14  
15  
16  
17  
18  
19  
20  
21  
22  
23  
24  
25  
26  
27  
28  
29  
30  
31  
32  
33  
34  
35  
36  
37  
38  
39  
40  
41  
42  
43  
44  
45  
46  
47

**Table 2** Comparison of crude and adjusted odds ratio for CKD among types of antipsychotics by conditional logistic regression

| Drug used      | CKD cases (n = 3411) | Controls (n = 10,233) | OR (95% CI)      | p-value | AOR <sup>a</sup> (95% CI) | p-value |
|----------------|----------------------|-----------------------|------------------|---------|---------------------------|---------|
| no FGA, no SGA | 3                    | 17                    | 0.76 (0.22-2.59) | 0.6570  | 0.53 (0.13-2.21)          | 0.3857  |
| FGA alone      | 300                  | 1278                  | 1                |         | 1                         | -       |
| SGA alone      | 26                   | 102                   | 1.10 (0.70-1.72) | 0.6920  | 1.06 (0.65-1.74)          | 0.8068  |
| Combination    | 3082                 | 8827                  | 1.50 (1.32-1.71) | <.0001  | 1.28 (1.11-1.47)          | .0009   |

OR: odds ratio; C I: confidence interval; AOR: adjusted odds ratio; FGA: first generation antipsychotic; SGA: second generation antipsychotic.

<sup>a</sup>Adjusted for diabetes mellitus, congestive heart failure, myocardial infarction, stroke, hyperlipidemia, hypercholesterolemia, hypertriglyceridemia, hypertension, and obesity.

**Table 3** Overall cumulative period of using second generation antipsychotics

| Period of SGA use                       | CKD cases<br>(n = 3411) | Controls<br>(n = 10,233) | OR (95% CI)      | p-value | AOR <sup>a</sup> (95% CI) | p-value |
|-----------------------------------------|-------------------------|--------------------------|------------------|---------|---------------------------|---------|
| <b>Cumulative SGA use</b>               |                         |                          |                  |         |                           |         |
| nonusers                                | 303                     | 1304                     | 1                |         | 1                         |         |
| 0 < period ≤ 90                         | 177                     | 552                      | 1.38 (1.12-1.71) | 0.0026  | 1.20 (0.95-1.51)          | 0.1247  |
| 90 < period ≤ 180                       | 92                      | 241                      | 1.65 (1.26-2.16) | 0.0003  | 1.42 (1.06-1.91)          | 0.0208  |
| 180 < period ≤ 1000                     | 409                     | 1271                     | 1.39 (1.17-1.64) | 0.0001  | 1.19 (0.99-1.43)          | 0.0654  |
| 1000 > period                           | 2430                    | 6865                     | 1.53 (1.34-1.75) | <.0001  | 1.30 (1.13-1.51)          | 0.0004  |
| <b>Cumulative clozapine use (days)</b>  |                         |                          |                  |         |                           |         |
| nonusers                                | 2318                    | 7215                     | 1                |         | 1                         |         |
| 0 < period ≤ 90                         | 183                     | 351                      | 1.63 (1.35-1.96) | <.0001  | 1.48 (1.20-1.81)          | 0.0002  |
| 90 < period ≤ 180                       | 49                      | 140                      | 1.09 (0.79-1.52) | 0.6057  | 0.91 (0.63-1.32)          | 0.6281  |
| 180 < period ≤ 1000                     | 178                     | 549                      | 1.01 (0.85-1.20) | 0.9091  | 0.94 (0.77-1.14)          | 0.5099  |
| 1000 > period                           | 683                     | 1978                     | 1.08 (0.98-1.19) | 0.1456  | 1.14 (1.02-1.27)          | 0.0181  |
| <b>Cumulative olanzapine use (days)</b> |                         |                          |                  |         |                           |         |
| nonusers                                | 2046                    | 6465                     | 1                |         | 1                         |         |
| 0 < period ≤ 90                         | 396                     | 1018                     | 1.23 (1.09-1.40) | 0.0012  | 1.18 (1.02-1.35)          | 0.0225  |
| 90 < period ≤ 180                       | 156                     | 344                      | 1.44 (1.18-1.75) | 0.0003  | 1.37 (1.11-1.70)          | 0.0039  |
| 180 < period ≤ 1000                     | 401                     | 1038                     | 1.22 (1.08-1.39) | 0.0017  | 1.15 (1.00-1.32)          | 0.0561  |
| 1000 > period                           | 412                     | 1368                     | 0.95 (0.85-1.08) | 0.4401  | 1.05 (0.92-1.19)          | 0.4954  |

| Period of SGA use                        | CKD cases<br>(n = 3411) | Controls<br>(n = 10,233) | OR (95% CI)      | p-value | AOR <sup>a</sup> (95% CI) | p-value |
|------------------------------------------|-------------------------|--------------------------|------------------|---------|---------------------------|---------|
| <b>Cumulative quetiapine use (days)</b>  |                         |                          |                  |         |                           |         |
| nonusers                                 | 1669                    | 6198                     | 1                |         | 1                         |         |
| 0 < period ≤ 90                          | 399                     | 967                      | 1.54 (1.35-1.75) | <.0001  | 1.36 (1.19-1.57)          | <.0001  |
| 90 < period ≤ 180                        | 147                     | 356                      | 1.54 (1.26-1.88) | <.0001  | 1.27 (1.02-1.58)          | 0.0358  |
| 180 < period ≤ 1000                      | 534                     | 1180                     | 1.69 (1.50-1.89) | <.0001  | 1.48 (1.30-1.68)          | <.0001  |
| 1000 > period                            | 662                     | 1532                     | 1.61 (1.45-1.79) | <.0001  | 1.44 (1.28-1.62)          | <.0001  |
| <b>Cumulative zotepine use (days)</b>    |                         |                          |                  |         |                           |         |
| nonusers                                 | 2292                    | 7375                     | 1                |         | 1                         |         |
| 0 < period ≤ 90                          | 319                     | 743                      | 1.38 (1.20-1.59) | <.0001  | 1.26 (1.08-1.47)          | 0.0038  |
| 90 < period ≤ 180                        | 120                     | 265                      | 1.46 (1.17-1.82) | 0.0008  | 1.27 (0.99-1.63)          | 0.0592  |
| 180 < period ≤ 1000                      | 310                     | 770                      | 1.30 (1.13-1.49) | 0.0003  | 1.16 (1.00-1.36)          | 0.0572  |
| 1000 > period                            | 370                     | 1080                     | 1.11 (0.97-1.26) | 0.1240  | 1.00 (0.87-1.15)          | 0.9854  |
| <b>Cumulative risperidone use (days)</b> |                         |                          |                  |         |                           |         |
| nonusers                                 | 896                     | 3056                     | 1                |         | 1                         |         |
| 0 < period ≤ 90                          | 396                     | 1078                     | 1.26 (1.09-1.44) | 0.0012  | 1.14 (0.98-1.33)          | 0.0927  |
| 90 < period ≤ 180                        | 207                     | 511                      | 1.39 (1.16-1.66) | 0.0003  | 1.26 (1.03-1.53)          | 0.0220  |
| 180 < period ≤ 1000                      | 733                     | 2028                     | 1.24 (1.10-1.38) | 0.0002  | 1.12 (0.99-1.26)          | 0.0845  |
| 1000 < period                            | 1179                    | 3560                     | 1.13 (1.03-1.25) | 0.0148  | 1.10 (0.99-1.23)          | 0.0756  |

OR: odds ratio; C I: confidence interval; AOR: adjusted odds ratio; SGA: second generation antipsychotic.

1  
2  
3  
4  
5  
6  
7 <sup>a</sup>Adjusted for diabetes mellitus, congestive heart failure, myocardial infarction, stroke, hyperlipidemia, hypercholesterolemia,  
8  
9  
10 hypertriglyceridemia, hypertension, and obesity.  
11  
12  
13  
14  
15  
16  
17  
18  
19  
20  
21  
22  
23  
24  
25  
26  
27  
28  
29  
30  
31  
32  
33  
34  
35  
36  
37  
38  
39  
40  
41  
42  
43  
44  
45  
46  
47

For peer review only

STROBE Statement—Checklist of items that should be included in reports of *case-control studies*

|                           | Item No | Page/line                              |
|---------------------------|---------|----------------------------------------|
| <b>Title and abstract</b> | 1       | (a) 1/1<br>(b) Page2                   |
| <b>Introduction</b>       |         |                                        |
| Background/rationale      | 2       | 4/1-4/33                               |
| Objectives                | 3       | 4/33-4/35                              |
| <b>Methods</b>            |         |                                        |
| Study design              | 4       | 4/35-4/37                              |
| Setting                   | 5       | 5/2-5/11                               |
| Participants              | 6       | (a) 5/2-5/6; 5/8-5/11<br>(b) 5/34-5/38 |
| Variables                 | 7       | 6/3-6/14                               |
| Data sources/ measurement | 8       | 5/3-5/8; 6/8-6/19                      |
| Bias                      | 9       | 6/19-6/20                              |
| Study size                | 10      | 5/16-5/17; 5/24-5/25                   |
| Quantitative variables    | 11      | 6/8-6/19                               |
| Statistical methods       | 12      | 6/22-6/28                              |
| <b>Results</b>            |         |                                        |
| Participants              | 13      | 6/31-6/32                              |
| Descriptive data          | 14      | 6/32-6/33                              |
| Outcome data              | 15      | 6/35-6/38                              |
| Main results              | 16      | 6/39-7/4                               |

1  
2  
3 Other analyses 17 7/4-7/6  
4  
5

---

6 **Discussion**

---

7 Key results 18 7/9-7/13

---

8 Limitations 19 8/10-8/13

---

9 Interpretation 20 7/14-7/39

---

10 Generalisability 21 8/1-8/9  
11

---

12 **Other information**

---

13 Funding 22 CMFHR 10537; Source of funding: Chi-Mei Medical Center. The role of the funder: Three of  
14 the authors work in Chi-Mei Medical Center.  
15

---

16  
17  
18  
19  
20  
21  
22  
23  
24  
25  
26  
27  
28  
29  
30  
31  
32  
33  
34  
35  
36  
37  
38  
39  
40  
41  
42  
43  
44  
45  
46  
47  
48  
49  
50  
51  
52  
53  
54  
55  
56  
57  
58  
59  
60

For peer review only

# BMJ Open

## Second-generation antipsychotic medications and risk of chronic kidney disease in schizophrenia: population based nested case-control study

|                                 |                                                                                                                                                                                                                                                                                                                                                 |
|---------------------------------|-------------------------------------------------------------------------------------------------------------------------------------------------------------------------------------------------------------------------------------------------------------------------------------------------------------------------------------------------|
| Journal:                        | <i>BMJ Open</i>                                                                                                                                                                                                                                                                                                                                 |
| Manuscript ID                   | bmjopen-2017-019868.R3                                                                                                                                                                                                                                                                                                                          |
| Article Type:                   | Research                                                                                                                                                                                                                                                                                                                                        |
| Date Submitted by the Author:   | 23-Feb-2018                                                                                                                                                                                                                                                                                                                                     |
| Complete List of Authors:       | Wang, Hsien-Yi ; Chi Mei Medical Center, Nephrology; Chia-Nan University of Pharmacy and Science<br>Huang, Charles Lung-Cheng ; Chi Mei Medical Center, Psychiatry<br>Feng, I Jung ; Chi Mei Medical Center, Chi Mei Hospital, Department of Medical Research<br>Tsuang, Hui-Chun; Chang Jung Christian University, Center of General Education |
| <b>Primary Subject Heading</b>: | Epidemiology                                                                                                                                                                                                                                                                                                                                    |
| Secondary Subject Heading:      | Pharmacology and therapeutics                                                                                                                                                                                                                                                                                                                   |
| Keywords:                       | second-generation antipsychotics, chronic kidney disease, schizophrenia                                                                                                                                                                                                                                                                         |
|                                 |                                                                                                                                                                                                                                                                                                                                                 |

SCHOLARONE™  
Manuscripts

Only



1  
2  
3 **Second-generation antipsychotic medications and risk of chronic**  
4 **kidney disease in schizophrenia: population based nested case-control**  
5 **study**  
6

7 **Running title:** Antipsychotics and kidney disease  
8  
9

10 Hsien-Yi Wang<sup>1,2</sup>, Charles Lung-Cheng Huang<sup>3</sup>, I Jung Feng<sup>4</sup>, Hui-Chun Tsuang<sup>\*,5</sup>  
11  
12

13 <sup>1</sup>Division of Nephrology, Chi Mei Medical Center, Tainan, Taiwan

14 <sup>2</sup>Department of Sport Management, College of Leisure and Recreation Management,  
15 Chia-Nan University of Pharmacy and Science, Tainan, Taiwan  
16

17 <sup>3</sup>Division of Psychiatry, Chi Mei Medical Center, Tainan, Taiwan

18 <sup>4</sup>Department of Medical Research, Chi Mei Medical Center, Tainan, Taiwan  
19

20 <sup>5</sup>Center of General Education, Chang Jung Christian University, Tainan, Taiwan  
21  
22

23  
24 **Address correspondence to:** Hui-Chun Tsuang, Center of General Education, School  
25 of Liberal Arts Education, Chang Jung Christian University, No. 1, Changda Rd.,  
26 Gueiren Dist., Tainan City 71101, Taiwan.  
27  
28

29  
30 Tel.: (+886) 6-278-5123; Fax: (+886) 6-278-5062; E-mail: hctsuang@gmail.com  
31  
32

33  
34 **Key words:** second-generation antipsychotics; chronic kidney disease; schizophrenia  
35  
36  
37  
38  
39  
40  
41  
42  
43  
44  
45  
46  
47  
48  
49  
50  
51  
52  
53  
54  
55  
56  
57  
58  
59  
60

## ABSTRACT

**Objectives:** The study aims to compare the risk of chronic renal diseases (CKD) between schizophrenic patients using first and second generation antipsychotics.

**Setting:** Datasets of 2000-2013 National Health Insurance in Taiwan were used.

**Participants:** The National Health Insurance reimbursement claims data have been transferred to and managed by the National Health Research Institute in Taiwan since 1996. We used the Psychiatric Inpatient Medical Claims database, a subset of the National Health Insurance Research Database, comprising a cohort of patients hospitalized for psychiatric disorders between 2000 and 2013 (n = 267807). The database included patients with at least one psychiatric inpatient record and one discharge diagnosis of mental disorders coded by the International Classification of Diseases, Ninth Revision (ICD-9) codes 290-319. The age of patients at first admission was restricted to 18-65 years.

**Primary outcome:** CKD (ICD-9 code 582, 583, 585, 586, 588) requiring hospitalization or three outpatient visits. The diagnosis of CKD follows the criteria of 'Kidney Disease: Improving Global Outcomes (KDIGO)' in Taiwan. CKD is defined as kidney damage as albumin-to-creatinine ratio >30 mg/g in two of three spot urine specimens, or glomerular filtration rate (GFR) <60 mL/min/1.73 m<sup>2</sup>, for 3 months or more.

**Results:** We found that the risks for CKD for those who used second generation antipsychotics longer cumulatively were higher than those who did not use second generation antipsychotics. Using nonusers, patients didn't have any second generation antipsychotics records, as reference group, the risks for CKD comparing those using second generation antipsychotics for 90 to 180 days with nonusers and those using second generation antipsychotics for more than 1000 days were 1.42 (1.06-1.91) and 1.30 (1.13-1.51), respectively.

**Conclusions:** The current study suggests the relationship between using second-generation antipsychotics and risk of CKD.

### Article summary:

#### Strengths:

- (1) We tracked subjects for period longer than 1000 days after the initial schizophrenia diagnosis day.
- (2) This is the first study investing the relationship between antipsychotics and risk of CKD in inpatients with schizophrenia.

#### Limitations:

- (1) The measurement of exposure, use of antipsychotic drugs, can only be estimated by the existing dataset we used.

1  
2  
3  
4  
5  
6  
7  
8  
9  
10  
11  
12  
13  
14  
15  
16  
17  
18  
19  
20  
21  
22  
23  
24  
25  
26  
27  
28  
29  
30  
31  
32  
33  
34  
35  
36  
37  
38  
39  
40  
41  
42  
43  
44  
45  
46  
47  
48  
49  
50  
51  
52  
53  
54  
55  
56  
57  
58  
59  
60

(2) Using existing dataset without personal identification, we cannot investigate all risk factors in the study.

Bullet points: The risk of CKD of inpatients of schizophrenia deserves furthers investigation. Besides, the study of risk of CKD for schizophrenic patients might need longer tracking duration.

For peer review only

## 1. Introduction

Schizophrenia is a chronic mental illness with lifetime prevalence rate around 1%[1-2]. Patients with schizophrenia have been shown to have an excess mortality, being 2 or 3 times as high as that in the general population[3-5]. Cardiovascular diseases have an increased prevalence among patients with schizophrenia[6]. Metabolic syndrome (MetS), a collection of visceral adiposity (measured by waist size), high fasting glucose, increased blood pressure, elevated triglyceride levels, and low high-density lipoprotein cholesterol levels[7], also seems to be a vital health problem to schizophrenia patients[8-9]. Furthermore, patients with schizophrenia are liable to develop diabetes mellitus (DM)[1, 10] and chronic kidney diseases (CKD)[11].

The introduction of second-generation antipsychotics in the early 1990s was initially associated with better quality of life, lower rate of relapse, and better tolerability than first-generation antipsychotics[12-14]. However, the superiority of second-generation antipsychotics has been criticized by subsequent studies[15-16]. For example, the association between weight gain and use of second-generation antipsychotics, clozapine in particular, has been reported[17].

More recent studies confirmed the above finding regarding to the concern of using second-generation antipsychotic medications. A study using the National Health Insurance Research Database in Taiwan[18] found that use of clozapine, quetiapine, olanzapine, zotepine, and risperidone was associated with increased risk of pneumonia. A nationwide German/Austrian Diabetes Survey, which recruiting 60,162 teenagers with type 1 diabetes, demonstrated that subjects treated with second-generation antipsychotics, risperidone in particular, showed higher BMI[19]. A national study[20] conducted in the US compared 107,551 youths using second-generation antipsychotics with 1,221,434 youths not using second-generation antipsychotics. The risk for incident diabetes mellitus was increased in youths taking second-generation antipsychotics. The risk was higher among those using ziprasidone and aripiprazole. However, the risk for incident type 2 diabetes mellitus was not associated with newer second-generation antipsychotics, quetiapine and olanzapine.

DM was one of risk factors to develop CKD[21]. Besides, schizophrenia has been shown to be associated with an increased risk of CKD in a nationwide study in Taiwan[11]. Therefore, we consider CKD to be included as an outcome variable, too. A population based, nested case control study is carried out here by applying the large national psychiatric database, the Psychiatric Inpatient Medical Claims database. Meanwhile, to provide a comprehensive picture of the risk of using antipsychotics, we compare people who used both first and second generation antipsychotics, people who use only second generation antipsychotics with those who used only first generation

1  
2  
3 drugs in our study.  
4  
5

## 6 **2. Methods**

### 7 *2.1. Study subjects*

8  
9 Taiwan started a single-payer National Health Insurance program on March 1,  
10 1995. The National Health Insurance reimbursement claims data have been  
11 transferred to and managed by the National Health Research Institute in Taiwan since  
12 1996. The database includes medical claim files representative of the entire  
13 population in Taiwan. All investigators signed an agreement that guarantees patient  
14 confidentiality before using the data. We used the Psychiatric Inpatient Medical  
15 Claims database, a subset of the National Health Insurance Research Database,  
16 comprising a cohort of patients hospitalized for psychiatric disorders between 2000  
17 and 2013 (n = 267807). The database included patients with at least one psychiatric  
18 inpatient record and one discharge diagnosis of mental disorders coded by the  
19 International Classification of Diseases, Ninth Revision (ICD-9) codes 290-319. The  
20 database includes patients' demographic characteristics, diagnoses, medical  
21 expenditures, and prescription claims data[22]. Each prescription record contains type  
22 of medication, dosage, time of prescription, and duration of drug supply. Information  
23 which could be used to identify beneficiaries and medical care providers were  
24 scrambled by the Bureau of National Health Insurance[23].  
25  
26  
27  
28  
29  
30

31 We enrolled patients with at least one psychiatric admission between 2000 and  
32 2013 but no psychiatric admissions between 1996 and 1999 (n = 13644). The  
33 inclusion criteria for the study cohort was that one's diagnosis at each discharge  
34 fulfilled the principal diagnosis of schizophrenia (ICD-9 code 295.\*\*\*) if a patient had  
35 several psychiatric admissions. The age of patients at first admission was restricted to  
36 18-65 years.  
37  
38  
39  
40

### 41 *2.2. Case and control definition*

42 In this study we conducted a nested case-control study derived from the cohort.  
43 Patients with CKD (ICD-9 code 582, 583, 585, 586, 588) requiring hospitalization or  
44 three outpatient visits were selected as cases (n = 3411). The date of first  
45 hospitalization for CKD or the third outpatient visit was defined as the index date.  
46 The diagnosis of CKD follows the criteria of 'Kidney Disease: Improving Global  
47 Outcomes (KDIGO)' in Taiwan. CKD is defined as kidney damage as  
48 albumin-to-creatinine ratio >30 mg/g in two of three spot urine specimens, or  
49 glomerular filtration rate (GFR) <60 mL/min/1.73 m<sup>2</sup>, for 3 months or more. For each  
50 case, 3 matched control subjects were randomly selected from the same schizophrenia  
51 patients who have not been diagnosed with CKD before index date. Control subjects  
52  
53  
54  
55  
56  
57  
58  
59  
60

1  
2  
3 were matched to the patients for age diagnosed with schizophrenia, gender, and the  
4 year diagnosed with schizophrenia. Each control was assigned the index date of the  
5 corresponding case. Patients diagnosed with CKD before the schizophrenia diagnosis  
6 date were excluded.  
7  
8  
9

### 10 11 *2.3. Measurement of exposure*

12  
13 The data of antipsychotic drug use was derived from the prescription files. The  
14 duration of treatment was calculated using the dispensed number of units and the  
15 dosing regimen for each patient. Second-generation antipsychotic drugs used in our  
16 study included clozapine, olanzapine, quetiapine, zotepine, risperidone, amisulpride,  
17 ziprasidone, aripiprazole, and paliperidone. First-generation antipsychotic drugs used  
18 in our study included chlorpromazine, levomepromazine, fluphenazine, perphenazine,  
19 trifluoperazine, thioridazine, pipotiazine, haloperidol, moperone, flupentixol,  
20 clopenthixol, chlorprothixene, pimozide, loxapine, sulpiride, clotiapine, and  
21 penfluridol. Because this study focused on the associations between the individual  
22 second-generation antipsychotic drug and the risk of CKD, all first-generation  
23 antipsychotic drugs were grouped together in the data analysis. The follow up period  
24 is from the schizophrenia diagnosis date to the index date.  
25  
26  
27  
28  
29  
30  
31  
32

### 33 *2.4. Covariates*

34 Age, gender and the duration of schizophrenia were controlled by the matching  
35 process of the study design.  
36  
37

### 38 *2.5. Statistical analysis*

39 For the comparisons of demographic between cases and controls, *t* test was used  
40 for continuous variables and  $\chi^2$  tests for discrete variables. Univariate and  
41 multivariable conditional logistic regressions were used to estimate the associations  
42 between the exposure to antipsychotic use and risk of CKD. Comorbidity factors,  
43 such as diabetes mellitus, congestive heart failure, myocardial infarction, stroke,  
44 hyperlipidemia, hypercholesterolemia, hypertriglyceridemia, hypertension, and  
45 obesity, were entered into adjusted model. Odds ratios (ORs) with 95% confidence  
46 intervals (CIs) were calculated. A p-value .05 was considered significant.  
47  
48  
49  
50  
51

### 52 *2.6 Patient and public involvement*

53 We used the National Health Insurance reimbursement claims data in Taiwan.  
54  
55  
56  
57  
58  
59  
60

### 3. Results

A total of 3411 patients with CKD and 10233 matched controls were enrolled in this study. Age, gender and the duration of schizophrenia of the cases and control subjects were well matched. The characteristics of patients with CKD and matched controls were compared and showed in Table 1. The cases were more likely to have comorbid conditions than controls (Table 1).

More than 85% subjects were received both FGA and SGA medications. Case and control groups separately include 3082 (90.4%) and 8827 (86.3%) subjects (Table 2). Taking patients using FGA only as reference group, the adjusted ORs [95%CI] for those who used no FGA and no SGA, SGA alone, both FGA and SGA were 0.53 [0.13-2.21], 1.06 [0.65-1.74], 1.28 [1.11-1.47] respectively (Table 2). Patients used both FGA and SGA have significant greater risk than patients used FGA only ( $p=0.0009$ ) (Table 2).

With the adjustment of comorbidity factors, the analysis results showed that greater risks of CKD for patients who received SGA than patients didn't receive, as the reference group. Especially, patients cumulatively used SGA 90-180 days and more than 1000 days have 42% and 30% significantly higher odds of developing CKD compared to reference group (adjusted OR[95%CI]=1.42[1.06-1.91], 1.30 [1.13-1.51]) (Table 3). Patients used olanzapine, quetiapine, zotepine or risperidone all displayed greater odds of developing CKD than reference group. Patients with quetiapine exposure have statistically significant higher risk than the reference group.

### 4. Discussion

We found that the risks for CKD for those who used second generation antipsychotics longer cumulatively were higher than those who did not use second generation antipsychotics. In addition, those who used only first generation antipsychotics and those who used both first and second generation antipsychotics seemed to have lower risk for CKD.

Also using the dataset of Taiwan National Health Insurance, Tzeng et al.[11] found that neither first nor second generation antipsychotics increased the risk of CKD. However, the study design of Tzeng et al. and ours varied a lot. Firstly, we focused on in patients while Tzeng et al. recruited patients with a first-time diagnosis of schizophrenia. Secondly, subjects of Tzeng et al. were tracked for 3 years or the end of 2010 from the initial diagnosis date until date of CKD diagnosis. We tracked subjects for longer period with one group tracked for 180 – 1000 days and another for period longer than 1000 days.

The introduction of second-generation antipsychotics in the early 1990s was



1  
2  
3 initially shown better quality of life, lower rate of relapse, and better tolerability than  
4 first-generation antipsychotics for patients of schizophrenia[13-14, 24] but has been  
5 criticized by other studies[15-16]. The risk of pneumonia in inpatients with  
6 schizophrenia was examined using the National Health Insurance Research Database  
7 in Taiwan from 2000 to 2008[18]. They found that current used of clozapine, one kind  
8 of second-generation antipsychotics, was associated with a dose-dependent increase in  
9 the risk of pneumonia for inpatients with schizophrenia. In addition, other kinds of  
10 second-generation antipsychotics, including quetiapine, olanzapine, zotepine, and  
11 risperidone, were associated with increased risk of pneumonia while no clear  
12 dose-dependent relationship was found. They suggested that patients with  
13 schizophrenia who used these antipsychotics to be monitored for pneumonia. Our  
14 study further suggests that inpatients with schizophrenia being monitored for CKD  
15 since we found that the risks for CKD for those who used second generation  
16 antipsychotics longer cumulatively were higher than those who did not use second  
17 generation antipsychotics. Similar to the findings of kuo et al., we did not see  
18 dose-dependent relationship second generation antipsychotics and risk of CKD.  
19

20  
21 The increasing prevalence of end-stage renal disease (ESRD) has been a global  
22 challenge. In the US, chronic renal diseases are the nation's ninth leading cause of  
23 death[24]. In Taiwan, chronic renal diseases have been the eighth leading cause of  
24 death since 1997, and was still the tenth leading cause of death recently[25].  
25  
26 Meanwhile, the high prevalence of CKD might contribute to the high prevalence of  
27 ESRD in Taiwan[26]. Our finding that inpatients with schizophrenia who used second  
28 generation antipsychotics longer have higher risks for CKD than those who did not  
29 use second generation antipsychotics reminds this population being monitored for  
30 CKD.  
31

32  
33 Some limitations need to be considered in the current study. First, because our  
34 data source is from a claim data set, it is hard to know how much medication each  
35 patient really take. Second, we can not include variables not captured in claim  
36 database, such as patients' lifestyle and family history. However, the current study  
37 suggests a hypothesis regarding the relationship between using second-generation  
38 antipsychotics and risk of CKD which warrants further study.  
39

#### 40 Declaration of interest

41 All authors declare that they have no conflicts of interest.  
42

#### 43 Contributors

44 Hui-Chun Tsuang and Hsien-Yi Wang initiated the study. Hui-Chun Tsuang,  
45 Hsien-Yi Wang and Charles Lung-Cheng Huang designed the study. I Jung Feng  
46  
47



1  
2  
3 analyzed the data. Hui-Chun Tsuang wrote the manuscript and Hsien-Yi Wang,  
4 Charles Lung-Cheng Huang and I Jung Feng approved the final manuscript.  
5  
6

#### 7 Acknowledgements

8 *The authors thank the Bureau of National Health Insurance and National Health*  
9 *Institutes for making available the databases for this study.*  
10  
11

#### 12 DATA SHARING STATEMENT

13  
14  
15 Datasets of National Health Insurance in Taiwan were used. All investigators should  
16 sign an agreement that guarantees patient confidentiality before using the data.  
17  
18

#### 19 References

- 20  
21 1. Chien, I.C., Hsu, J.-H., Lin, C.-H., Bih, S.-H., Chou, Y.-J., Chou, P., 2009. Prevalence of  
22 diabetes in patients with schizophrenia in Taiwan: a population-based National  
23 Health Insurance study. *Schizophrenia Research* 111(1-3), 17-22.
- 24  
25 2. Hovatta, I., Terwilliger, J., Lichtermann, D., Mäkiö, T., Suvisaari, J., Peltonen, L.,  
26 Lönnqvist, J., 1997. Schizophrenia in the genetic isolate of Finland. *American*  
27 *Journal of Medical Genetics* 74, 353-360.
- 28  
29 3. Brown, S., 1997. Excess mortality of schizophrenia. A meta-analysis. *Br J Psychiatry*  
30 171, 502-508.
- 31  
32 4. Brown, S., Kim, M., Mitchell, C., Inskip, H., 2010. Twenty-five year mortality of a  
33 community cohort with schizophrenia. *Br J Psychiatry* 196(116-121).
- 34  
35 5. Osby, U., Correia, N., Brandt, L., Ekblom, A., Sparén, P., 2000. Time trends in  
36 schizophrenia mortality in Stockholm county, Sweden: cohort study. *BMJ* 321,  
37 483-484.
- 38  
39 6. Capasso, R., Lineberry, T., Bostwick, J., Decker, P., St Sauver, J., 2008. Mortality in  
40 schizophrenia and schizoaffective disorder: an Olmsted County, Minnesota  
41 cohort: 1950-2005. *Schizophrenia Research* 98, 287-294.
- 42  
43 7. Grundy, S., Cleeman, J., Daniels, S., Donato, K., Eckel, R., Franklin, B., Gordon, D.,  
44 Krauss, R., Savage, P., Smith, S.J., Spertus, J., Costa, F., American Heart  
45 Association; National Heart, L., and Blood Institute, 2005. Diagnosis and  
46 management of the metabolic syndrome: an American Heart  
47 Association/National Heart, Lung, and Blood Institute Scientific Statement.  
48 *Circulation* 112, 2735-2752.
- 49  
50 8. Correll, C., Detraux, J., De Lepeleire, J., De Hert, M., 2015. Effects of antipsychotics,  
51 antidepressants and mood stabilizers on risk for physical diseases in people with  
52 schizophrenia, depression and bipolar disorder. *World Psychiatry* 14(2), 119-136.  
53  
54  
55  
56  
57  
58  
59  
60

- 1  
2  
3 9. Manu, P., Dima, L., Shulman, M., Vancampfort, D., De Hert, M., Correll, C., 2015.  
4 Weight gain and obesity in schizophrenia: epidemiology, pathobiology, and  
5 management. *Acta Psychiatr Scand* 132(2), 97-108.  
6
- 7 10. Saddichha, S., Manjunatha, N., Ameen, S., Akhtar, S., 2008. Diabetes and  
8 schizophrenia - effect of disease or drug? Results from a randomized,  
9 double-blind, controlled prospective study in first-episode schizophrenia. *Acta  
10 Psychiatrica Scandinavica* 117(5), 342-347.  
11
- 12 11. Tzeng, N., Hsu, Y., Ho, S., Kuo, Y., Lee, H., Yin, Y., Chen, H., Chen, W., Chu, W.,  
13 Huang, H., 2015. Is schizophrenia associated with an increased risk of chronic  
14 kidney disease? A nationwide matched-cohort study. *BMJ Open* 5, e006777.  
15
- 16 12. Awad, A., Voruganti, L., 2004. Impact of atypical antipsychotics on quality of life in  
17 patients with schizophrenia. *CNS Drugs* 18, 877-893.  
18
- 19 13. Leucht, S., Barnes, T., Kissling, W., Engel, R., Correll, C., Kane, J., 2003a. Relapse  
20 prevention in schizophrenia with new-generation antipsychotics: a systematic  
21 review and exploratory meta-analysis of randomized, controlled trials. *Am J  
22 Psychiatry* 160, 1209-1222.  
23
- 24 14. Leucht, S., Wahlbeck, K., Hamann, J., Kissling, W., 2003b. New generation  
25 antipsychotics versus low-potency conventional antipsychotics: a systematic  
26 review and meta-analysis. *Lancet* 361, 1581-1589.  
27
- 28 15. Jones, P., Barnes, T., Davies, L., Dunn, G., Lloyd, H., Hayhurst, K., Murray, R.,  
29 Markwick, A., Lewis, S., 2006. Randomized controlled trial of the effect on  
30 Quality of Life of second- vs first-generation antipsychotic drugs in schizophrenia:  
31 Cost Utility of the Latest Antipsychotic Drugs in Schizophrenia Study (CUtLASS 1).  
32 *Arch Gen Psychiatry* 63, 1079-1087.  
33
- 34 16. Lieberman, J., Stroup, T., McEvoy, J., Swartz, M., Rosenheck, R., Perkins, D., Keefe  
35 RS, Davis, S., Davis, C., Lebowitz, B., Severe, J., Hsiao, J., Investigators.,  
36 C.A.T.o.I.E.C., 2005. Effectiveness of antipsychotic drugs in patients with chronic  
37 schizophrenia. *N Engl J Med* 353, 1209-1223.  
38
- 39 17. Bai, Y., Lin, C., Chen, J., Chen, T., Su, T., Chou, P., 2011. Association of weight gain  
40 and metabolic syndrome in patients taking clozapine: an 8-year cohort study. *J  
41 Clin Psychiatry* 72, 751-756.  
42
- 43 18. Kuo, C., Yang, S., Liao, Y., Chen, W., Lee, W., Shau, W., Chang, Y., Tsai, S., Chen, C.,  
44 2013. Second-generation antipsychotic medications and risk of pneumonia in  
45 schizophrenia. *Schizophr Bull* 39, 648-657.  
46
- 47 19. Galler, A., Bollow, E., Meusers, M., Bartus, B., Näke, A., Haberland, H., Schober, E.,  
48 Holl, R., Mellitus., G.F.M.o.E.a.R.B.C.N.D., 2015. Comparison of glycemic and  
49 metabolic control in youth with type 1 diabetes with and without antipsychotic  
50 medication: analysis from the nationwide German/Austrian Diabetes Survey  
51  
52  
53  
54  
55  
56  
57  
58  
59

- 1  
2  
3 (DPV). *Diabetes Care* 38(6), 1051-1057.
- 4 20. Rubin, D., Kreider, A., Matone, M., Huang, Y., Feudtner, C., Ross, M., Localio, A.,  
5 2015. Risk for incident diabetes mellitus following initiation of  
6 second-generation antipsychotics among Medicaid-enrolled youths. *JAMA*  
7 *Pediatr* 169(4), e150285.
- 8  
9  
10 21. Hwang, S., Tsai, J., Chen, H., 2010. Epidemiology, impact and preventive care of  
11 chronic kidney disease in Taiwan. *Nephrology (Carlton) Suppl* 2, 3-9.
- 12  
13 22. Gau, C., Chang, C., Tsai, F., Chao, P., Gau, S., 2010. Association between mood  
14 stabilizers and hypothyroidism in patients with bipolar disorders: a nested,  
15 matched case-control study. *Bipolar Disord* 12, 253-263.
- 16  
17 23. Gau, S., Chung, C., Gau, C., 2008. A pharmaco-economic analysis of atypical  
18 antipsychotics and haloperidol in first-episode schizophrenic patients in taiwan.  
19 *J Clin Psychopharmacol* 28, 271-278.
- 20  
21 24. Arias, E., Anderson, R., Kung, H., Murphy, S., Kochanek, K., 2003. Deaths: final  
22 data for 2001. *Natl Vital Stat Rep* 52(3), 1-115.
- 23  
24 25. Department of Health, 2017. Department of Health: Health and Vital Statistics  
25 Republic of China 2017, Taiwan, ROC.
- 26  
27 26. Hsu, C., Hwang, S., Wen, C., Chang, H., Chen, T., Shiu, R., Horng, S., Chang, Y., Yang,  
28 W., 2006. High prevalence and low awareness of CKD in Taiwan: a study on the  
29 relationship between serum creatinine and awareness from a nationally  
30 representative survey. *Am J Kidney Dis* 48, 727-738.
- 31  
32  
33  
34  
35  
36  
37  
38  
39  
40  
41  
42  
43  
44  
45  
46  
47  
48  
49  
50  
51  
52  
53  
54  
55  
56  
57  
58  
59  
60

**Table 1** Basic characteristics of the study population

| Characteristic                           | Cases (n = 3411) n (%) | Controls (n = 10,233) n (%) |
|------------------------------------------|------------------------|-----------------------------|
| Age (mean $\pm$ SD years)                | 41.1 $\pm$ 10.2        | 41.1 $\pm$ 10.2             |
| Male                                     | 1871 (54.9)            | 5613 (54.9)                 |
| Follow-up duration (mean $\pm$ SD years) | 7.71 $\pm$ 4.71        | 7.71 $\pm$ 4.71             |
| Comorbidities                            |                        |                             |
| Diabetes mellitus***                     | 1299 (38.1)            | 1006 (9.8)                  |
| Congestive heart failure***              | 207 (6.1)              | 86 (0.8)                    |
| Myocardial infarction***                 | 41 (1.2)               | 23 (0.2)                    |
| Stroke***                                | 220 (6.5)              | 195 (1.9)                   |
| Hyperlipidemia***                        | 502 (14.7)             | 433 (4.2)                   |
| Hypercholesterolemia***                  | 111 (3.3)              | 90 (0.9)                    |
| Hypertriglyceridemia***                  | 86 (2.5)               | 62 (0.6)                    |
| Hypertension***                          | 1232 (36.1)            | 1147 (11.2)                 |
| Obesity***                               | 49 (1.4)               | 37 (0.4)                    |

SD: standard deviation.

\*\*\* < 0.0001

1  
2  
3  
4  
5  
6  
7  
8  
9  
10  
11  
12  
13  
14  
15  
16  
17  
18  
19  
20  
21  
22  
23  
24  
25  
26  
27  
28  
29  
30  
31  
32  
33  
34  
35  
36  
37  
38  
39  
40  
41  
42  
43  
44  
45  
46  
47

**Table 2** Comparison of crude and adjusted odds ratio for CKD among types of antipsychotics by conditional logistic regression

| Drug used      | CKD cases (n = 3411) | Controls (n = 10,233) | OR (95% CI)      | p-value | AOR <sup>a</sup> (95% CI) | p-value |
|----------------|----------------------|-----------------------|------------------|---------|---------------------------|---------|
| no FGA, no SGA | 3                    | 17                    | 0.76 (0.22-2.59) | 0.6570  | 0.53 (0.13-2.21)          | 0.3857  |
| FGA alone      | 300                  | 1278                  | 1                |         | 1                         | -       |
| SGA alone      | 26                   | 102                   | 1.10 (0.70-1.72) | 0.6920  | 1.06 (0.65-1.74)          | 0.8068  |
| Combination    | 3082                 | 8827                  | 1.50 (1.32-1.71) | <.0001  | 1.28 (1.11-1.47)          | .0009   |

OR: odds ratio; C I: confidence interval; AOR: adjusted odds ratio; FGA: first generation antipsychotic; SGA: second generation antipsychotic.

<sup>a</sup>Adjusted for diabetes mellitus, congestive heart failure, myocardial infarction, stroke, hyperlipidemia, hypercholesterolemia, hypertriglyceridemia, hypertension, and obesity.

**Table 3** Overall cumulative period of using second generation antipsychotics

| Period of SGA use                       | CKD cases<br>(n = 3411) | Controls<br>(n = 10,233) | OR (95% CI)      | p-value | AOR <sup>a</sup> (95% CI) | p-value |
|-----------------------------------------|-------------------------|--------------------------|------------------|---------|---------------------------|---------|
| <b>Cumulative SGA use</b>               |                         |                          |                  |         |                           |         |
| nonusers                                | 303                     | 1304                     | 1                |         | 1                         |         |
| 0 < period ≤ 90                         | 177                     | 552                      | 1.38 (1.12-1.71) | 0.0026  | 1.20 (0.95-1.51)          | 0.1247  |
| 90 < period ≤ 180                       | 92                      | 241                      | 1.65 (1.26-2.16) | 0.0003  | 1.42 (1.06-1.91)          | 0.0208  |
| 180 < period ≤ 1000                     | 409                     | 1271                     | 1.39 (1.17-1.64) | 0.0001  | 1.19 (0.99-1.43)          | 0.0654  |
| 1000 > period                           | 2430                    | 6865                     | 1.53 (1.34-1.75) | <.0001  | 1.30 (1.13-1.51)          | 0.0004  |
| <b>Cumulative clozapine use (days)</b>  |                         |                          |                  |         |                           |         |
| nonusers                                | 2318                    | 7215                     | 1                |         | 1                         |         |
| 0 < period ≤ 90                         | 183                     | 351                      | 1.63 (1.35-1.96) | <.0001  | 1.48 (1.20-1.81)          | 0.0002  |
| 90 < period ≤ 180                       | 49                      | 140                      | 1.09 (0.79-1.52) | 0.6057  | 0.91 (0.63-1.32)          | 0.6281  |
| 180 < period ≤ 1000                     | 178                     | 549                      | 1.01 (0.85-1.20) | 0.9091  | 0.94 (0.77-1.14)          | 0.5099  |
| 1000 > period                           | 683                     | 1978                     | 1.08 (0.98-1.19) | 0.1456  | 1.14 (1.02-1.27)          | 0.0181  |
| <b>Cumulative olanzapine use (days)</b> |                         |                          |                  |         |                           |         |
| nonusers                                | 2046                    | 6465                     | 1                |         | 1                         |         |
| 0 < period ≤ 90                         | 396                     | 1018                     | 1.23 (1.09-1.40) | 0.0012  | 1.18 (1.02-1.35)          | 0.0225  |
| 90 < period ≤ 180                       | 156                     | 344                      | 1.44 (1.18-1.75) | 0.0003  | 1.37 (1.11-1.70)          | 0.0039  |
| 180 < period ≤ 1000                     | 401                     | 1038                     | 1.22 (1.08-1.39) | 0.0017  | 1.15 (1.00-1.32)          | 0.0561  |
| 1000 > period                           | 412                     | 1368                     | 0.95 (0.85-1.08) | 0.4401  | 1.05 (0.92-1.19)          | 0.4954  |

| Period of SGA use                        | CKD cases<br>(n = 3411) | Controls<br>(n = 10,233) | OR (95% CI)      | p-value | AOR <sup>a</sup> (95% CI) | p-value |
|------------------------------------------|-------------------------|--------------------------|------------------|---------|---------------------------|---------|
| <b>Cumulative quetiapine use (days)</b>  |                         |                          |                  |         |                           |         |
| nonusers                                 | 1669                    | 6198                     | 1                |         | 1                         |         |
| 0 < period ≤ 90                          | 399                     | 967                      | 1.54 (1.35-1.75) | <.0001  | 1.36 (1.19-1.57)          | <.0001  |
| 90 < period ≤ 180                        | 147                     | 356                      | 1.54 (1.26-1.88) | <.0001  | 1.27 (1.02-1.58)          | 0.0358  |
| 180 < period ≤ 1000                      | 534                     | 1180                     | 1.69 (1.50-1.89) | <.0001  | 1.48 (1.30-1.68)          | <.0001  |
| 1000 > period                            | 662                     | 1532                     | 1.61 (1.45-1.79) | <.0001  | 1.44 (1.28-1.62)          | <.0001  |
| <b>Cumulative zotepine use (days)</b>    |                         |                          |                  |         |                           |         |
| nonusers                                 | 2292                    | 7375                     | 1                |         | 1                         |         |
| 0 < period ≤ 90                          | 319                     | 743                      | 1.38 (1.20-1.59) | <.0001  | 1.26 (1.08-1.47)          | 0.0038  |
| 90 < period ≤ 180                        | 120                     | 265                      | 1.46 (1.17-1.82) | 0.0008  | 1.27 (0.99-1.63)          | 0.0592  |
| 180 < period ≤ 1000                      | 310                     | 770                      | 1.30 (1.13-1.49) | 0.0003  | 1.16 (1.00-1.36)          | 0.0572  |
| 1000 > period                            | 370                     | 1080                     | 1.11 (0.97-1.26) | 0.1240  | 1.00 (0.87-1.15)          | 0.9854  |
| <b>Cumulative risperidone use (days)</b> |                         |                          |                  |         |                           |         |
| nonusers                                 | 896                     | 3056                     | 1                |         | 1                         |         |
| 0 < period ≤ 90                          | 396                     | 1078                     | 1.26 (1.09-1.44) | 0.0012  | 1.14 (0.98-1.33)          | 0.0927  |
| 90 < period ≤ 180                        | 207                     | 511                      | 1.39 (1.16-1.66) | 0.0003  | 1.26 (1.03-1.53)          | 0.0220  |
| 180 < period ≤ 1000                      | 733                     | 2028                     | 1.24 (1.10-1.38) | 0.0002  | 1.12 (0.99-1.26)          | 0.0845  |
| 1000 < period                            | 1179                    | 3560                     | 1.13 (1.03-1.25) | 0.0148  | 1.10 (0.99-1.23)          | 0.0756  |

OR: odds ratio; C I: confidence interval; AOR: adjusted odds ratio; SGA: second generation antipsychotic.

1  
2  
3  
4  
5  
6  
7 <sup>a</sup>Adjusted for diabetes mellitus, congestive heart failure, myocardial infarction, stroke, hyperlipidemia, hypercholesterolemia,  
8  
9  
10 hypertriglyceridemia, hypertension, and obesity.  
11  
12  
13  
14  
15  
16  
17  
18  
19  
20  
21  
22  
23  
24  
25  
26  
27  
28  
29  
30  
31  
32  
33  
34  
35  
36  
37  
38  
39  
40  
41  
42  
43  
44  
45  
46  
47

For peer review only



STROBE Statement—Checklist of items that should be included in reports of *case-control studies*

|                           | Item No | Page/line                              |
|---------------------------|---------|----------------------------------------|
| <b>Title and abstract</b> | 1       | (a) 1/1<br>(b) Page2                   |
| <b>Introduction</b>       |         |                                        |
| Background/rationale      | 2       | 4/1-4/33                               |
| Objectives                | 3       | 4/33-4/35                              |
| <b>Methods</b>            |         |                                        |
| Study design              | 4       | 4/35-4/37                              |
| Setting                   | 5       | 5/2-5/11                               |
| Participants              | 6       | (a) 5/2-5/6; 5/8-5/11<br>(b) 5/34-5/38 |
| Variables                 | 7       | 6/3-6/14                               |
| Data sources/ measurement | 8       | 5/3-5/8; 6/8-6/19                      |
| Bias                      | 9       | 6/19-6/20                              |
| Study size                | 10      | 5/16-5/17; 5/24-5/25                   |
| Quantitative variables    | 11      | 6/8-6/19                               |
| Statistical methods       | 12      | 6/22-6/28                              |
| <b>Results</b>            |         |                                        |
| Participants              | 13      | 6/31-6/32                              |
| Descriptive data          | 14      | 6/32-6/33                              |
| Outcome data              | 15      | 6/35-6/38                              |
| Main results              | 16      | 6/39-7/4                               |

1  
2  
3 Other analyses 17 7/4-7/6  
4

---

5 **Discussion**

6  
7 Key results 18 7/9-7/13

8 Limitations 19 8/10-8/13

9 Interpretation 20 7/14-7/39

10 Generalisability 21 8/1-8/9  
11

---

12 **Other information**

13 Funding 22 CMFHR 10537; Source of funding: Chi-Mei Medical Center. The role of the funder: Three of  
14 the authors work in Chi-Mei Medical Center.  
15

16  
17  
18  
19  
20  
21  
22  
23  
24  
25  
26  
27  
28  
29  
30  
31  
32  
33  
34  
35  
36  
37  
38  
39  
40  
41  
42  
43  
44  
45  
46  
47  
48  
49  
50  
51  
52  
53  
54  
55  
56  
57  
58  
59  
60

For peer review only
